# Supplementary material for: Melt–rock interactions in a veined mantle: pyroxenite–peridotite reaction experiments at 2 GPa
Source: Copernicus journal article supplement (doi:10.5194/ejm-34-109-2022), 2022-02-16
Supplement: Supplementary file 1 [file ejm-34-109-2022-supplement.zip]

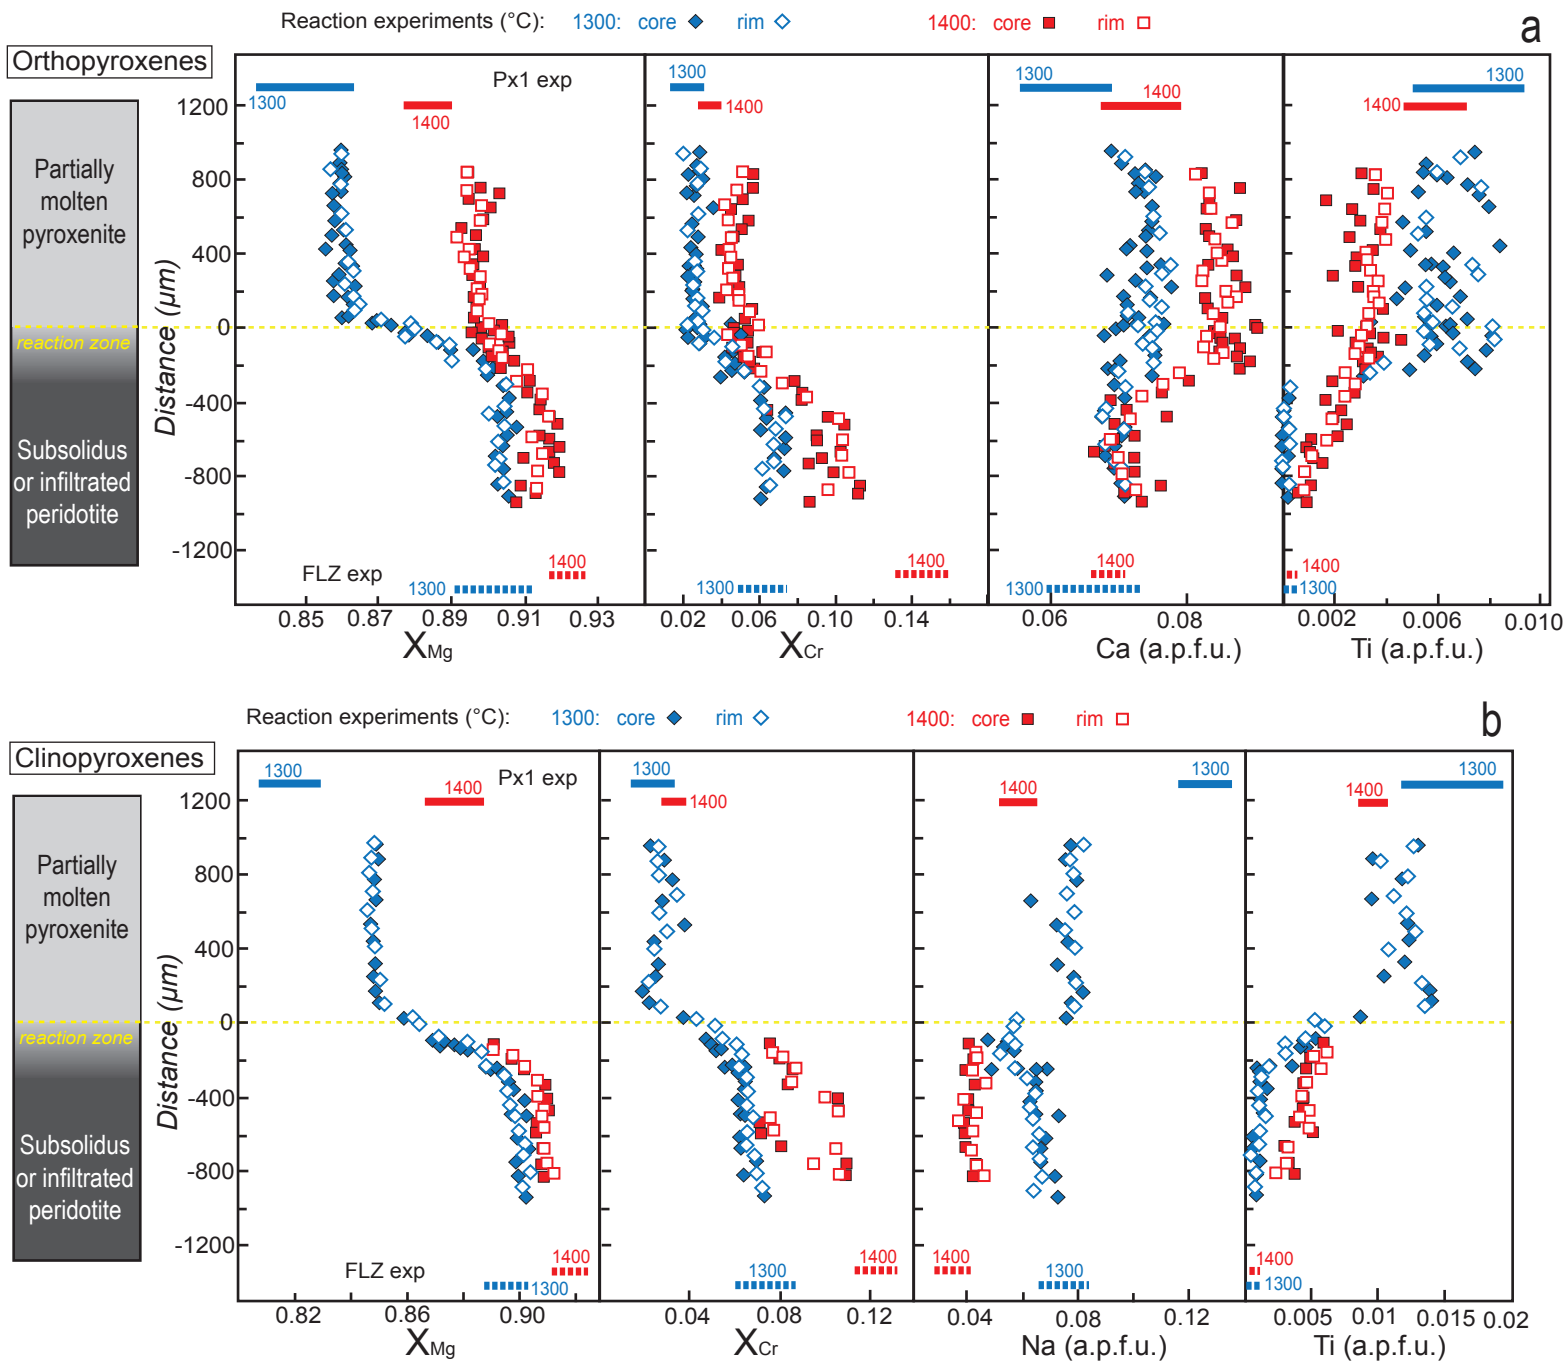

Suppl. Fig. 1. Profiles of  $X_{Mg}$  [ $X_{Mg} = Mg/(Mg + Fe_{tot})$ ],  $X_{Cr}$  [ $X_{Cr} = Cr/(Cr + Al)$ ], Ca, Na and Ti contents (a.p.f.u.) derived from analyses on cores and rims of orthopyroxenes (a) and clinopyroxenes (b) along the charges after reaction experiments at 2 GPa, 1300 and 1400°C. Colored bars at the top of the diagrams indicate the compositional variability observed in melting experiments on Px1. Distance = 0 μm marks the interface between the partially molten pyroxenite and the orthopyroxene-rich reaction layer.
