# Supplementary material for: Melt–rock interactions in a veined mantle: pyroxenite–peridotite reaction experiments at 2 GPa
Source: Copernicus journal article supplement (doi:10.5194/ejm-34-109-2022), 2022-02-16
Supplement: Supplementary file 1 [file Tables S1-S9 .xlsx]

## Sheet: Table S1
Supplementary Table 1
Average compositions of orthopyroxene (wt%) from experiments on FLZ at 2 Gpa
Run (T°C)	1300	1σ st	1350	1σ st	1380	1σ st	1400	1σ st
SiO2	53.851	0.535463	53.18	0.717147	54.0333	0.112724	54.27	0.140357
TiO2	0.00478	0.00508108	0	0	0.0183333	0.00408248	0.004	0.00547723
Al2O3	6.763	0.425312	6.66333	0.240069	5.795	0.12276	5.786	0.139571
Cr2O3	0.707	0.131153	0.724	0.0822943	1.23	0.0822192	1.432	0.0843801
FeO	6.137	0.319411	5.73333	0.215484	5.39333	0.184572	4.888	0.172829
MgO	31.374	0.352206	31.2067	0.080829	32.0183	0.127971	32.724	0.39323
MnO	0	0	0.0261333	0.0395218	0	0	0	0
CaO	1.817	0.127632	1.86333	0.106927	1.865	0.0450555	2.012	0.0563028
Na2O	0.162	0.033928	0.151633	0.0600803	0.078	0.0218998	0.1338	0.0379763
K2O	0	0	0.0113333	0.00694286	0	0	0	0
Total	100.816	0.447157	99.5598	0.575391	100.431	0.183756	101.25	0.286348
Si	1.85156	0.0122172	1.84996	0.013187	1.86209	0.00303661	1.8541	0.00365057
Ti	0.000123788	0.000131588	0	0	0.000475262	0.000105906	0.000102769	0.000140724
Al	0.274053	0.0170297	0.273187	0.0112232	0.235366	0.00488975	0.232986	0.00619243
Cr	0.0192186	0.00354391	0.0199126	0.00233941	0.0335132	0.0022343	0.0386762	0.00218088
Fe	0.176498	0.00980407	0.166792	0.00653314	0.155435	0.0052903	0.139668	0.0053251
Mg	1.60789	0.0173495	1.61806	0.0124463	1.64465	0.00675479	1.66635	0.0158857
Mn	0	0	0.000770006	0.001159	0	0	0	0
Ca	0.0669398	0.00473907	0.0694484	0.00370468	0.068862	0.00168761	0.0736473	0.0020297
Na	0.0107975	0.00224567	0.0102271	0.00400788	0.00521089	0.00145965	0.00885916	0.00249166
K	0	0	0.000502915	0.00030818	0	0	0	0
XMg	0.901083	0.0055421	0.906551	0.00338575	0.913657	0.00270288	0.922651	0.00334353
XCr	0.0656017	0.0123268	0.0679381	0.00787873	0.124643	0.0079665	0.142479	0.0100027
XMg = Mg/(Mg+Fetot). XCr = Cr/(Cr+Al). Cations are calculated on the basis of 6 oxygens and all Fe = Fe2+.

## Sheet: Table S2
Supplementary Table 2
Average compositions (wt%) of clinopyroxene from experiments on FLZ at 2 Gpa
Run (T°C)	1300	1σ st	1350	1σ st	1380	1σ st	1400	1σ st
SiO2	52.6773	0.28573	51.714	0.461428	51.395	0.285784	51.295	0.218518
TiO2	0.0109091	0.013751	0.00375	0.00568746	0.0181	0.0114159	0.0233333	0.0121106
Al2O3	7.29455	0.30484	7.101	0.345911	6.395	0.316623	6.125	0.122923
Cr2O3	0.885455	0.091909	0.97062	0.0835396	1.0888	0.0483616	1.25833	0.0767898
FeO	3.87182	0.249632	3.586	0.291784	3.339	0.0841229	3.065	0.0993479
MgO	18.6545	0.519603	17.998	0.378852	19.035	0.354471	19.165	0.27711
MnO	0.00727273	0.0155505	0.00148	0.00468017	0.01363	0.0136486	0.012	0.020199
CaO	16.4173	0.58045	18.173	0.363014	17.648	0.223696	17.7385	0.344002
Na2O	1.07909	0.0711975	0.83299	0.0463693	0.59312	0.0418411	0.501667	0.0594699
K2O	0.00727273	0.00786245	0.00123	0.00260855	0	0	0.01	0.00894427
Total	100.919	0.355625	100.382	0.318583	99.5257	0.389498	99.1958	0.341503
Si	1.87	0.00548743	1.85527	0.0143443	1.85684	0.00836535	1.85869	0.00592052
Ti	0.000291857	0.000368241	0.000101091	0.000153155	0.000491927	0.000310239	0.000636	0.000329937
Al	0.305204	0.0130034	0.300251	0.0147161	0.272273	0.0127823	0.261582	0.00566396
Cr	0.0248523	0.00257925	0.0275327	0.00238392	0.0311043	0.00144696	0.0360558	0.00231405
Fe	0.114943	0.00735718	0.107598	0.0088637	0.100891	0.00278972	0.0928869	0.00326786
Mg	0.98703	0.0263869	0.962402	0.019511	1.02504	0.0186428	1.03506	0.0125734
Mn	0.000218024	0.000465626	4.48482e-05	0.000141823	0.000417091	0.000417319	0.000368139	0.000619066
Ca	0.624444	0.022605	0.698535	0.0138986	0.683143	0.00893913	0.688655	0.0125833
Na	0.0742779	0.00499472	0.0579405	0.00320567	0.0415519	0.00300741	0.0352408	0.00413908
K	0.00032893	0.000355264	5.62221e-05	0.000119192	0	0	0.000462388	0.000413329
XMg	0.895771	0.00417954	0.899487	0.00734739	0.910375	0.00273642	0.917629	0.003457
XCr	0.0753574	0.00777814	0.0841977	0.0087012	0.102689	0.00638594	0.121092	0.00611132
XMg = Mg/(Mg+Fetot). XCr = Cr/(Cr+Al). Cations are calculated on the basis of 6 oxygens and all Fe = Fe2+.

## Sheet: Table S3
Supplementary Table 3
Average compositions (wt%) of spinel from experiments on FLZ at 2 Gpa
Run (T°C)	1300	1σ st	1350	1σ st	1380	1σ st	1400	1σ st
SiO2	0.42696	0.181169	0.12238	0.0410271	0.26108	0.146536	0.326	0.110136
TiO2	0.03238	0.00633024	0.02112	0.00771051	0.02832	0.00807385	0.02272	0.00751512
Al2O3	57.954	0.440885	57.24	0.433244	53.936	0.715772	51.848	0.633853
Cr2O3	11.344	0.444837	12.496	0.454015	16.12	1.00442	18.502	0.451575
FeO	8.372	0.15975	8.098	0.118406	7.882	0.128725	7.534	0.230716
MgO	22.594	0.11929	22.38	0.233238	22.646	0.175585	22.706	0.115888
CaO	0.07986	0.0539294	0.04058	0.0242279	0.0576	0.0410037	0.0576	0.0410037
Na2O	0.01108	0.0142517	0.00426	0.00715108	0	0	0	0
Total	100.814	0.351713	100.407	0.313657	100.931	0.597192	100.996	0.298192
Si	0.0107993	0.00455174	0.00312002	0.00104425	0.00669661	0.00376463	0.00841247	0.00284849
Ti	0.000616545	0.000120607	0.000405071	0.000148073	0.00054594	0.000154787	0.000441129	0.000146768
Al	1.72906	0.0092677	1.71998	0.0126455	1.62992	0.0229926	1.57646	0.0153638
Cr	0.227067	0.00946204	0.251892	0.00910332	0.32677	0.0199296	0.377415	0.0100504
Fe	0.177239	0.00328639	0.172665	0.00253835	0.16901	0.00240735	0.162544	0.0047406
Mg	0.852514	0.00270742	0.850476	0.00811074	0.865473	0.00548743	0.873141	0.00613056
Ca	0.00216439	0.00146139	0.00110934	0.000665415	0.00158098	0.00112442	0.00159079	0.00113038
Na	0.000543247	0.000697591	0.000210345	0.000352634	0	0	0	0
XMg	0.827892	0.00229404	0.831243	0.00151007	0.836627	0.00166383	0.843069	0.00381801
XCr	0.116075	0.00464304	0.12774	0.0044588	0.167013	0.0104218	0.193174	0.00557098
XMg = Mg/(Mg+Fetot). XCr = Cr/(Cr+Al). Cations are calculated on the basis of 4 oxygens and all Fe = Fe2+.

## Sheet: Table S4
Supplementary Table 4
Average compositions (wt%) of olivine from experiments on FLZ at 2 Gpa
Run (T°C)	1300	1σ st	1350	1σ st	1380	1σ st	1400	1σ st
SiO2	41.311	0.206476	40.921	0.331644	40.83	0.244182	41.572	0.187015
TiO2	0.01543	0.0164196	0.01838	0.0174777	0.00437778	0.00498141	0.006845	0.0124655
Al2O3	0.27865	0.324213	0.1124	0.0735104	0.153567	0.101847	0.09249	0.018709
Cr2O3	0.09602	0.0657482	0.11507	0.0469423	0.136022	0.0564929	0.32306	0.0390801
FeO	9.529	0.226885	9.144	0.157917	8.21889	0.163129	7.1695	0.230616
MgO	50.283	0.273863	49.93	0.306159	50.1056	0.567431	51.798	0.20516
MnO	0.01743	0.0185992	0.01459	0.0159168	0.0117778	0.0131946	0.00562	0.00759228
CaO	0.19235	0.0138248	0.18926	0.0167692	0.225456	0.0233653	0.2326	0.0184
Na2O	0.02312	0.0145342	0.00779	0.0127938	0.0364778	0.0365795	0.01453	0.0137648
K2O	0.00598	0.00453279	0.00706	0.00735092	0	0	0.00364	0.00532585
Total	101.765	0.203069	100.46	0.48698	99.7221	0.537446	101.232	0.3788
Si	0.992902	0.0044595	0.995031	0.00500099	0.996215	0.00569276	0.994643	0.00292538
Ti	0.000278901	0.000296588	0.000335894	0.000318795	8.05454e-05	9.18472e-05	0.000123056	0.000224123
Al	0.00789178	0.00918372	0.0032148	0.00208889	0.00441266	0.00291332	0.00260772	0.000524872
Cr	0.00182378	0.00124894	0.00221206	0.000904427	0.0026204	0.00107601	0.00611133	0.000739608
Fe	0.191534	0.00455643	0.185946	0.0031008	0.167715	0.00390177	0.143449	0.00444175
Mg	1.80135	0.0102735	1.80966	0.0116503	1.82214	0.0145097	1.84721	0.00626614
Mn	0.000354888	0.00037898	0.000299549	0.000325876	0.000243027	0.000272494	0.000114025	0.000154298
Ca	0.00495308	0.000353142	0.0049316	0.000446061	0.00589307	0.00060374	0.00596123	0.000369753
Na	0.00107699	0.000676002	0.00036576	0.000600771	0.00172913	0.00173794	0.000674081	0.000638232
K	0.000183299	0.000138971	0.000218879	0.000227593	0	0	0.000111196	0.000162684
XMg	0.90389	0.00232268	0.906817	0.00180561	0.915715	0.00186053	0.92794	0.00218369
XMg = Mg/(Mg+Fetot). Cations are calculated on the basis of 4 oxygens and all Fe = Fe2+.

## Sheet: Table S5
Supplementary Table 5
Representative major element compositions (wt%) of orthopyroxene from experiment PPR1 (2 GPa, 1300°C)
Distance (µm)	-910	-840	-760	-690	-640	-580	-540	-480	-450	-380	-310	-260	-230	-220	-180	-150	-120	-80	-40	-40	-30	-10	10	20	20	30	50	60	120	160	170	220	250	280	330	340	350	440	410	420	490	520	570	650	720	730	770	810	830
SiO2	54.65	54.3	54.01	53.89	54.01	54.89	54.65	54.3	54.89	54.65	54.01	53.48	52.89	53.04	52.44	53.68	52.83	54.24	52.01	53.65	52.44	53.86	52.5	53.46	53.13	53.89	52.87	53.38	54.62	54.36	52.64	54.21	52.91	53.15	54.35	54.17	54.05	53.2	53.09	53.81	53.44	54.05	53.24	53.49	53.74	54.56	53.2	53.11	54.12
TiO2	0.01	0	0	0.012	0	0	0.01	0	0	0.01	0	0.12	0.19	0.2878	0.277	0.21	0.3	0.23	0.31	0.22	0.25	0.21	0.24	0.22	0.25	0.13	0.2713	0.21	0.23	0.17	0.261	0.18	0.2479	0.24	0.24	0.21	0.22	0.32	0.2523	0.19	0.2799	0.21	0.1777	0.3043	0.29	0.2	0.27	0.243	0.23
Al2O3	5.73	7.03	6.42	7.22	6.42	5.41	5.73	7.03	5.41	5.73	6.42	7	7.22	7.74	8.12	6.82	7.35	7.36	9.03	7.26	8.02	7.38	7.91	7.44	7.42	6.36	6.88	7.33	6.65	6.49	7.86	5.71	7.56	7.75	6.92	6.07	6.49	7.69	6.49	6.94	7.53	6.41	7.42	6.4	7.23	6.25	7.19	7.55	6.95
Cr2O3	0.54	0.7	0.74	0.7686	0.74	0.63	0.54	0.7	0.63	0.54	0.62	0.42	0.58	0.53	0.58	0.44	0.52	0.31	0.2967	0.34	0.62	0.23	0.32	0.29	0.32	0.44	0.2526	0.29	0.3	0.26	0.2964	0.21	0.2934	0.25	0.28	0.21	0.25	0.27	0.2622	0.29	0.311	0.14	0.2698	0.349	0.2714	0.2	0.29	0.3406	0.23
FeO	5.94	5.99	6.06	6.13	6.06	6	5.84	5.99	6	5.94	6.06	6.14	6.08	6.03	6.07	6.64	6.24	6.87	7.34	7.02	7.25	7.18	7.53	7.15	8.09	7.92	8.54	8.24	8.22	8.16	8.47	8.04	8.53	8.23	8.14	8.26	8.27	8.26	8.34	8.64	8.51	8.24	8.58	8.55	8.44	8.33	8.25	8.31	8.38
MgO	32.03	31.1	32.02	31.65	32.02	32.06	32.23	31.1	32.06	32.03	32.02	30.84	30.93	30.81	30.14	30.58	30.04	29.99	29.52	29.72	28.99	29	29.02	29.08	29.79	29.46	29.25	28.64	28.86	28.37	28.49	28.41	28.71	28.03	28.57	28.53	28.75	28.57	29.13	28.54	28.48	28.36	28.92	28.78	28.28	28.52	28.15	28.56	28.69
MnO	0.01	0.02	0	0	0	0.05	0.01	0.02	0.05	0.01	0	0.02	0.06	0.0624	0.0416	0.08	0.14	0.09	0.0669	0.1	0.04	0.09	0.12	0.12	0.13	0.09	0.0972	0.11	0.14	0.15	0.0717	0.11	0.0841	0.06	0.11	0.08	0.15	0.15	0.1149	0.09	0.0755	0.13	0.1509	0.1478	0.1094	0.18	0.1	0.1246	0.12
CaO	1.93	1.92	1.89	1.86	1.89	1.92	1.93	1.84	1.85	1.93	1.89	2.02	1.88	1.86	1.9	2.03	2.01	2	1.83	2.01	1.86	1.87	1.89	1.95	2.07	2.05	1.95	1.91	1.93	2	1.89	2.06	1.94	1.82	1.99	2.03	1.97	1.92	1.97	1.91	1.99	1.98	2.01	2	1.99	1.95	1.94	2.02	1.95
Na2O	0.16	0.13	0.12	0.1764	0.12	0.22	0.16	0.13	0.22	0.16	0.12	0.13	0.22	0.1607	0.1265	0.21	0.28	0.26	0.1715	0.23	0.22	0.24	0.2	0.2	0.3	0.17	0.297	0.23	0.26	0.27	0.3058	0.26	0.2354	0.25	0.22	0.27	0.22	0.26	0.2698	0.2	0.23	0.24	0.2351	0.2767	0.2287	0.23	0.2	0.2357	0.26
K2O	0	0	0.0078	0	0	0	0	0	0.01	0.0063	0	0.02	0.03	0.0113	0.0094	0.01	0.01	0.02	0	0	0	0.01	0.01	0	0.01	0	0.0075	0	0.01	0	0	0	0.0059	0	0.01	0	0.02	0.01	0	0.01	0	0	0	0.018	0	0.01	0	0.0132	0
Total	101.04	101.23	101.288	101.749	101.28	101.18	101.14	101.15	101.12	101.046	101.28	100.19	100.89	100.888	100.569	100.54	99.49	101.37	100.584	100.56	99.98	100.07	99.74	99.91	101.51	100.51	100.429	100.34	101.23	100.3	100.285	99.24	100.529	99.8	100.86	99.83	100.39	100.66	99.9303	100.64	100.846	99.76	101.038	100.317	100.579	100.44	99.62	100.544	100.93
Si	1.8731	1.85689	1.84962	1.83745	1.84967	1.87971	1.87081	1.8578	1.88045	1.87306	1.84967	1.85014	1.81871	1.82085	1.80612	1.8548	1.84307	1.85823	1.80245	1.85526	1.83268	1.86902	1.83563	1.85995	1.83285	1.87213	1.84618	1.85863	1.883	1.89127	1.83789	1.90549	1.8433	1.85862	1.87968	1.89436	1.88073	1.84788	1.86046	1.87033	1.85376	1.89052	1.84644	1.86852	1.86731	1.89596	1.86558	1.84846	1.87311
Ti	0.000257811	0	0	0.000307766	0	0	0.000257496	0	0	0.000257806	0	0.00312267	0.00491446	0.00743178	0.00717622	0.00545804	0.00787253	0.00592705	0.0080811	0.00572254	0.00657199	0.00548148	0.00631203	0.00575741	0.00648721	0.00339706	0.00712601	0.00550005	0.00596428	0.00444893	0.00685448	0.00475918	0.00649632	0.0063129	0.00624349	0.00552402	0.00575818	0.00836071	0.00665054	0.00496752	0.00730334	0.00552506	0.00463571	0.00799573	0.00757964	0.00522777	0.00712193	0.00636169	0.00598775
Al	0.231462	0.283332	0.259118	0.290135	0.259125	0.218349	0.231179	0.283471	0.218434	0.231457	0.259125	0.285408	0.295035	0.314536	0.332687	0.277731	0.302206	0.297175	0.368824	0.295887	0.330335	0.301827	0.325955	0.305071	0.301679	0.260399	0.283144	0.300798	0.270194	0.266118	0.32343	0.236548	0.31041	0.319406	0.282062	0.250177	0.266153	0.314806	0.268045	0.284294	0.307848	0.26424	0.303289	0.263487	0.296082	0.25597	0.297157	0.309696	0.283494
Cr	0.0146333	0.0189261	0.0200362	0.0207198	0.0200368	0.0170575	0.0146154	0.0189353	0.0170642	0.0146329	0.0168013	0.0114878	0.0158996	0.0144487	0.0159415	0.0120063	0.0143184	0.00839687	0.00812964	0.00929588	0.0171314	0.00631032	0.00884612	0.00797715	0.00872797	0.0120853	0.00697389	0.00798344	0.00817705	0.00715195	0.00818196	0.00583611	0.00808158	0.00691199	0.0076563	0.00580631	0.00687777	0.00741484	0.00726469	0.00796946	0.00852951	0.0038716	0.00739803	0.00963888	0.00745599	0.00549492	0.00804039	0.00937251	0.00629374
Fe	0.17026	0.171305	0.173555	0.174793	0.17356	0.171833	0.167189	0.171388	0.1719	0.170256	0.17356	0.177639	0.174844	0.173119	0.174835	0.191871	0.182055	0.19683	0.21273	0.203015	0.211347	0.208366	0.22018	0.208034	0.233395	0.230096	0.24939	0.239938	0.236988	0.237422	0.24731	0.236342	0.248522	0.240681	0.235432	0.241568	0.240654	0.239937	0.244416	0.251145	0.246872	0.241029	0.248852	0.249774	0.245255	0.242078	0.241943	0.241875	0.242552
Mg	1.6363	1.58519	1.63442	1.60848	1.63447	1.63643	1.6445	1.58597	1.63707	1.63626	1.63447	1.59024	1.58528	1.57651	1.54726	1.57492	1.56206	1.53141	1.52486	1.53186	1.50621	1.49996	1.51237	1.508	1.53177	1.52544	1.52239	1.48636	1.48296	1.47119	1.48262	1.48845	1.49083	1.46098	1.47275	1.4871	1.49109	1.47913	1.52154	1.47858	1.47252	1.47852	1.49496	1.49848	1.46465	1.4772	1.47135	1.48159	1.48003
Mn	0.000290306	0.000579298	0	0	0	0.00145029	0.000289951	0.000579581	0.00145086	0.0002903	0	0.000586042	0.00174754	0.00181443	0.00121357	0.00234132	0.00413691	0.00261161	0.00196376	0.00292901	0.001181	0.0026453	0.0035538	0.00353623	0.00379853	0.00264824	0.00287486	0.0032441	0.00408802	0.0044203	0.00212035	0.00327496	0.00248165	0.00177715	0.00322228	0.00236963	0.00442088	0.00441305	0.00341047	0.00264961	0.0022183	0.00385137	0.00443274	0.00437306	0.00321975	0.00529802	0.00297022	0.00367315	0.0035178
Ca	0.0708739	0.0703471	0.0693471	0.0679484	0.0693491	0.0704463	0.0707872	0.0674489	0.0679046	0.0708723	0.0693491	0.0748725	0.0692639	0.0684135	0.0701127	0.0751519	0.0751305	0.0734121	0.0679496	0.0744714	0.0694662	0.069526	0.0708022	0.0726886	0.0765095	0.0763028	0.0729555	0.0712537	0.0712877	0.0745527	0.0707006	0.0775807	0.0724135	0.0681893	0.0737388	0.0760604	0.0734439	0.0714532	0.0739661	0.0711289	0.0739603	0.074201	0.0746882	0.0748537	0.074085	0.0726019	0.0728891	0.0753259	0.0723099
Na	0.0106325	0.00861934	0.00796771	0.0116614	0.00796794	0.0146072	0.0106195	0.00862355	0.0146129	0.0106322	0.00796794	0.00871967	0.0146676	0.0106962	0.00844732	0.0140685	0.0189393	0.0172702	0.0115235	0.0154208	0.0148686	0.0161474	0.0135582	0.0134911	0.0200656	0.0114504	0.0201078	0.015527	0.0173787	0.0182131	0.0207007	0.0177193	0.0159005	0.01695	0.014752	0.0183068	0.0148422	0.0175097	0.0183313	0.0134781	0.0154689	0.0162758	0.0158086	0.0187404	0.0154074	0.0154963	0.0135981	0.0159052	0.0174471
K	0	0	0.000340743	0	0	0	0	0	0.000437011	0.000275439	0	0.000882606	0.00131594	0.000494849	0.000412987	0.000440767	0.000445026	0.000874044	0	0	0	0.000442661	0.000446016	0	0.000440059	0	0.00033408	0	0.000439767	0	0	0	0.000262202	0	0.000441172	0	0.000887739	0.000443084	0	0.000443382	0	0	0	0.000802086	0	0.000443281	0	0.000586047	0
XMg	0.905754	0.902474	0.904006	0.901982	0.904006	0.904974	0.907717	0.902474	0.904974	0.905754	0.904006	0.899519	0.900664	0.901054	0.898475	0.891401	0.895617	0.886109	0.877571	0.88298	0.876949	0.878029	0.872916	0.878771	0.867777	0.868931	0.859243	0.86101	0.862212	0.861044	0.85704	0.862974	0.857118	0.858561	0.862174	0.860258	0.861034	0.860426	0.861596	0.854806	0.856419	0.85983	0.857295	0.857129	0.856568	0.859198	0.858785	0.859657	0.859193
XCr	0.0594617	0.0626156	0.0717748	0.0666542	0.0717748	0.0724599	0.0594617	0.0626156	0.0724599	0.0594617	0.061	0.0386932	0.051	0.044	0.046	0.041	0.045	0.0274792	0.0215667	0.03046	0.049	0.0204789	0.026422	0.0254822	0.0281178	0.0443522	0.0240381	0.0258547	0.0293747	0.0261718	0.0246733	0.024078	0.0253745	0.0211818	0.0264267	0.0226824	0.0251905	0.0230117	0.0263874	0.027268	0.0269599	0.0144403	0.0238119	0.035291	0.0245636	0.0210159	0.0263449	0.0293746	0.0217184
Distance = 0 marks the boundary between the partially molten pyroxenite and the reaction zone.
XMg = Mg/(Mg+Fetot). XCr = Cr/(Cr+Al). Cations are calculated on the basis of 6 oxygens and all Fe = Fe2+.
Representative major element compositions of orthopyroxene from experiment PPR2 (2 GPa, 1350°C)
Distance (µm)	-1040	-980	-880	-780	-720	-640	-570	-480	-460	-430	-320	-280	-230	-150	-140	-120	-110	-90	-40	-30	10	10	50	60	110	150	220	230	280	360	430	480	550	590	690	760	820	880	930	980	1060
SiO2	54.2334	53.92	53.22	53.86	54.0804	53.397	53.8662	53.6724	53.805	53.7846	53.142	54.4374	53.5704	53.7336	54.77	54.0192	53.6724	53.0298	53.1318	52.2444	54.1518	54.1148	54.0294	53.2644	54.1212	53.0196	53.7438	54.57	53.7132	53.5806	53.4684	53.9172	54.1598	52.9482	53.5296	53.5194	53.244	54.01	53.7846	54.066	53.2542
TiO2	0.006018	0.016	0.0098	0.023	0.007	0.013	0.006	0.019686	0.01	0.0144	0	0	0.093228	0.025704	0.115362	0.248166	0	0.156876	0.24429	0.295086	0.263466	0.209202	0.194208	0.152082	0.2652	0.252756	0.221136	0.284886	0.195636	0.231744	0.156366	0.203184	0.1581	0.255714	0.139842	0.149022	0.26928	0.182172	0.15045	0.138822	0.282846
Al2O3	7.2318	7.21	7.15	7.1706	6.8442	6.732	7.1706	7.293	6.8952	8.007	7.548	6.2424	7.8948	6.6402	6.09	6.9054	5.7018	8.0478	7.8132	8.3334	6.5994	6.15	6.5484	7.9866	6.324	8.3232	7.1604	6.6096	6.7422	6.732	6.987	6.4056	6.22	7.8948	6.6708	6.7812	7.599	6.53	7.089	6.25	7.6806
Cr2O3	0.812226	0.910146	0.92	0.89	0.612408	0.7293	0.910146	0.656166	0.880362	0.51	0.829566	0.750006	0.461958	0.56406	0.345576	0.301308	0.615366	0.425136	0.440844	0.246534	0.39474	0.292842	0.274686	0.418506	0.324156	0.458694	0.230928	0.361182	0.333336	0.262956	0.327318	0.26724	0.326298	0.287742	0.279174	0.270504	0.29376	0.24735	0.346698	0.2856	0.342618
FeO	5.4672	5.46	5.51	5.48	5.72	5.66	5.4978	5.5794	5.6406	5.7426	5.6406	5.7528	5.9772	5.9874	6.6708	6.72	6.2526	6.4668	6.8952	7.1298	7.1298	7.1	7.4358	7.2318	7.4052	7.33	7.548	7.55	7.5786	7.7112	7.6806	7.65	7.78	7.6908	7.956	7.7112	7.5276	7.74	7.6194	7.5908	7.5174
MgO	31.1304	31.47	31.52	31.42	31.5996	31.5588	31.4568	31.2732	31.6098	30.88	31.0896	31.5078	30.804	30.8754	31.365	30.12	31.0284	30.0594	30.243	30.0572	29.784	30.44	29.9574	29.5596	30.0288	29.34	29.4168	29.6412	29.1006	29.3454	29.3862	29.7942	29.8962	28.8864	29.3394	29.7432	28.56	30.03	29.1618	29.7126	29.0394
MnO	0	0.012	0.04	0.06	0	0	0.01122	0	0.018666	0.041616	0	0	0.067728	0	0.023052	0.08415	0	0.111282	0.060486	0.061914	0.087312	0.138414	0.15912	0.0612	0.134334	0.049164	0.112506	0.072726	0.083436	0.084252	0.125868	0.064056	0.149226	0.093126	0.115464	0.06783	0.115362	0.102102	0.097614	0.17952	0.123012
CaO	2.0604	2.02	2.01	1.96	1.9686	1.989	2.0502	1.7952	1.79	2.0502	1.8564	1.7544	2.091	1.8564	1.8666	2.0196	2.12	1.938	1.77	1.88	2.0094	2.1216	2.0094	1.8768	2.1828	1.85	1.9278	2.2236	2.0706	1.9686	2.0706	2.0502	1.9584	2.04	1.9584	1.9584	2.11	2.05	2.04	2.2134	1.9788
Na2O	0.175644	0.09	0.11	0.13	0.188292	0.128826	0.14178	0.106794	0.142494	0.159732	0.190128	0.158916	0.125256	0.136272	0.186354	0.221238	0.178194	0.15657	0.186762	0.145962	0.187578	0.259998	0.29376	0.194718	0.327624	0.154326	0.218586	0.263466	0.334968	0.240108	0.249288	0.291312	0.29223	0.238884	0.313956	0.294984	0.261834	0.259896	0.243474	0.189822	0.306
K2O	0	0	0	0	0	0	0	0	0	0	0	0	0	0	0	0	0	0	0	0	0	0	0	0	0	0	0	0	0	0	0	0	0	0	0	0	0	0	0	0	0
Total	101.117	101.148	100.52	101.014	101.02	100.208	101.143	100.396	100.792	101.224	100.431	100.604	101.106	99.8385	101.463	100.639	99.5917	100.392	100.786	100.394	100.632	100.842	100.907	100.75	101.113	100.851	100.626	101.577	100.201	100.157	100.549	100.666	100.94	100.395	100.354	100.496	100.039	101.152	100.63	100.744	100.525
Si	1.85335	1.84388	1.83419	1.84458	1.85236	1.84544	1.84314	1.84704	1.84725	1.8378	1.83302	1.87062	1.8353	1.86276	1.87309	1.86337	1.87127	1.83323	1.83277	1.81269	1.8714	1.86896	1.8663	1.83951	1.86703	1.83066	1.8605	1.8723	1.86936	1.86557	1.85675	1.86846	1.8728	1.8405	1.86385	1.85837	1.85521	1.86349	1.86364	1.87332	1.84686
Ti	0.000154694	0.000411561	0.000254055	0.000592503	0.00018035	0.000337954	0.000154428	0.000509583	0.000258247	0.000370114	0	0	0.00240248	0.000670258	0.00296764	0.00643909	0	0.0040793	0.00633857	0.00770131	0.00684873	0.00543476	0.00504604	0.00395069	0.0068816	0.00656456	0.00575826	0.00735232	0.00512144	0.00606938	0.00408441	0.00529636	0.00411222	0.00668608	0.00366257	0.00389226	0.00705762	0.00472788	0.00392128	0.00361808	0.00737841
Al	0.291268	0.290585	0.290423	0.289429	0.276289	0.274209	0.28917	0.295792	0.279	0.322453	0.306842	0.25281	0.31877	0.271298	0.245464	0.280734	0.234289	0.327891	0.317642	0.34077	0.26879	0.25033	0.266589	0.325073	0.257117	0.338702	0.292141	0.267271	0.276546	0.27625	0.285957	0.26162	0.253489	0.323431	0.273747	0.277512	0.312057	0.265535	0.289497	0.255225	0.313929
Cr	0.0219454	0.0246077	0.0250688	0.0240989	0.0165846	0.0199281	0.0246224	0.0178532	0.0238969	0.0137781	0.0226233	0.0203765	0.012513	0.0154601	0.00934408	0.00821747	0.0169627	0.0116199	0.0120231	0.00676297	0.0107855	0.00799638	0.00750179	0.0114273	0.00884128	0.012522	0.00632053	0.00979771	0.00917214	0.00723875	0.00898673	0.00732208	0.00892081	0.00790797	0.00768544	0.00742627	0.00809267	0.00674749	0.00949801	0.0078239	0.00939437
Fe	0.156247	0.156146	0.15881	0.156952	0.163847	0.163589	0.157321	0.160572	0.161951	0.164099	0.162708	0.16532	0.171252	0.173582	0.190788	0.193855	0.182306	0.186958	0.19891	0.20688	0.206057	0.205068	0.214801	0.208865	0.213637	0.211657	0.218519	0.216633	0.220575	0.224534	0.223052	0.221704	0.224983	0.22357	0.231669	0.223923	0.219349	0.223332	0.220791	0.219954	0.218024
Mg	1.58566	1.60404	1.61917	1.60388	1.61326	1.62569	1.60433	1.60411	1.61756	1.57273	1.59837	1.61377	1.57298	1.59536	1.59881	1.54861	1.61242	1.54886	1.55494	1.55442	1.53417	1.56698	1.54238	1.52159	1.54404	1.50997	1.51786	1.51584	1.50955	1.52293	1.52102	1.53895	1.54086	1.49663	1.52266	1.53937	1.48325	1.54434	1.5061	1.53449	1.50108
Mn	0	0.000347576	0.00116766	0.00174048	0	0	0.000325178	0	0.0005428	0.00120445	0	0	0.00196533	0	0.000667745	0.00245862	0	0.00325843	0.00176724	0.00181953	0.00255572	0.00404901	0.00465546	0.0017902	0.00392515	0.00143782	0.00329885	0.00211348	0.00245952	0.00248468	0.00370217	0.00188019	0.00437063	0.00274184	0.00340525	0.00199493	0.00340464	0.00298383	0.00286485	0.0052685	0.00361339
Ca	0.0754399	0.0740104	0.0742206	0.0719194	0.0722441	0.0736505	0.0751618	0.0661907	0.0658437	0.0750579	0.0686054	0.0645916	0.0767527	0.0689509	0.0683953	0.0746405	0.0791916	0.0717811	0.0654163	0.0698877	0.074401	0.0785064	0.0743664	0.0694449	0.0806783	0.0684388	0.0715024	0.0817405	0.0772087	0.0734378	0.0770389	0.0761222	0.072556	0.0759756	0.0730595	0.0728585	0.0787705	0.075782	0.0757344	0.0821688	0.0735261
Na	0.0116377	0.00596719	0.00735033	0.00863215	0.0125044	0.00863237	0.00940593	0.00712552	0.00948514	0.0105822	0.0127151	0.0105877	0.00832001	0.00915927	0.0123566	0.0147964	0.0120454	0.0104942	0.0124907	0.00981902	0.0125684	0.0174099	0.0196738	0.0130381	0.0219131	0.0103313	0.0146712	0.0175263	0.0226026	0.0162089	0.0167842	0.0195731	0.0195922	0.0160997	0.0211948	0.0198592	0.0176886	0.0173859	0.0163569	0.012752	0.0205753
K	0	0	0	0	0	0	0	0	0	0	0	0	0	0	0	0	0	0	0	0	0	0	0	0	0	0	0	0	0	0	0	0	0	0	0	0	0	0	0	0	0
XMg	0.910301	0.91129	0.910679	0.910865	0.907801	0.908573	0.910696	0.909008	0.908991	0.905518	0.907609	0.907076	0.901818	0.901872	0.893391	0.888747	0.898421	0.892294	0.886587	0.882541	0.881592	0.884276	0.877758	0.8793	0.878454	0.87706	0.874152	0.874957	0.872509	0.871508	0.872108	0.874078	0.872592	0.870033	0.867945	0.873009	0.871169	0.873658	0.872145	0.87463	0.873176
XCr	0.0700656	0.0780719	0.0794596	0.0768639	0.056627	0.067751	0.0784672	0.0569216	0.0788943	0.040978	0.0686667	0.0745882	0.0377713	0.0539134	0.036671	0.028439	0.0675128	0.0342254	0.0364706	0.01946	0.0385783	0.0309545	0.0273698	0.0339592	0.0332431	0.0356524	0.021177	0.035362	0.032102	0.0255345	0.0304693	0.0272255	0.0339958	0.0238667	0.0273083	0.0260627	0.0252778	0.0247812	0.0317664	0.0297431	0.0290557
Distance = 0 marks the boundary between the partially molten pyroxenite and the reaction zone.
XMg = Mg/(Mg+Fetot). XCr = Cr/(Cr+Al). Cations are calculated on the basis of 6 oxygens and all Fe = Fe2+.
Representative major element compositions of orthopyroxene from experiment PPR3 (2 GPa, 1380°C)
Distance (µm)	-1120	-1030	-930	-850	-770	-680	-540	-480	-390	-330	-280	-220	-150	-60	0	90	150	210	290	330	420	470	520	580	660	710	770	850
SiO2	54.96	54.24	54.38	53.54	54.7	54.81	53.82	53.77	53.85	52.45	53.74	51.81	51.58	52.3	53.16	53.34	52.74	54.49	52.87	53.28	53.16	53.01	53.26	53.95	52.8	54.64	54.83	55
TiO2	0.0256	0.0432	0.098	0.1129	0.055	0.1455	0.0879	0.067	0.1128	0.1678	0.1456	0.1506	0.19	0.19	0.1678	0.1971	0.1693	0.1125	0.1385	0.2	0.1693	0.1197	0.1953	0.0877	0.2117	0.1974	0.1504	0.146
Al2O3	4.74	4.88	5.01	7.72	5	4.96	5.58	5.65	7.43	8.19	7.11	8.34	8.72	8.84	7.59	6.78	7.64	5.61	7.14	6.75	6.54	6.79	7.22	5.83	7.74	4.72	5.26	5.26
Cr2O3	0.5584	0.7007	0.6204	0.6439	0.972	0.88	0.997	1.0147	0.6382	0.6735	0.6922	0.6925	0.4688	0.3645	0.3507	0.2439	0.2638	0.2789	0.2307	0.3911	0.3883	0.3519	0.313	0.3296	0.2788	0.267	0.3171	0.3152
FeO	6.06	6.02	6.17	6.08	5.96	5.92	5.98	6.08	6.32	6.02	6.47	6.31	6.61	6.72	6.78	7.52	7.34	7.48	7.37	7.25	7.51	7.54	7.26	7.41	7.4	7.42	7.78	7.67
MgO	31.93	31.88	31.97	31.58	31.29	31.28	31.12	31.08	31.48	30.62	31.22	30.5	30.4	30.24	29.61	30.81	29.66	30.22	29.36	30.14	30.27	29.84	28.57	30.27	29.83	31.02	30.65	30.37
MnO	0	0	0	0.0085	0.0596	0	0	0	0.0626	0.0278	0.058	0.0417	0.0664	0.0524	0.0409	0.0478	0.0771	0.105	0.0924	0.1126	0.0895	0.1265	0.0955	0.0996	0.1149	0.0895	0.0864	0.1296
CaO	2.11	2.04	2.17	2.12	1.98	2.03	2.17	2.03	1.96	1.96	2.11	1.93	2	1.97	1.97	2.04	2.12	1.98	1.99	1.95	1.91	2	2.1	1.99	2.16	2.02	1.96	1.93
Na2O	0.1471	0.181	0.1195	0.097	0.202	0.1377	0.115	0.1426	0.1289	0.11	0.1408	0.1347	0.1279	0.1529	0.2085	0.2345	0.2165	0.2071	0.2666	0.2124	0.2011	0.2443	0.3967	0.1494	0.1767	0.2521	0.2207	0.23
K2O	0.0047	0	0.0099	0.0012	0.0191	0.0063	0.0068	0.0005	0.0084	0.0052	0.015	0.0165	0	0.0139	0.0089	0.0193	0.0125	0.0035	0.0123	0.003	0.0181	0	0.0042	0	0.0139	0.0111	0.0151	0.0059
Total	100.536	99.9849	100.577	101.957	100.267	100.03	99.8228	99.8689	101.991	100.242	101.702	99.9518	100.17	100.844	99.8868	101.342	100.271	100.494	99.6406	100.29	100.318	100.025	99.4967	100.138	100.798	100.637	101.303	101.057
Si	1.89445	1.88207	1.87752	1.82282	1.89163	1.89733	1.8713	1.86936	1.83317	1.81538	1.83737	1.80298	1.79178	1.80396	1.84836	1.83913	1.83464	1.88857	1.85094	1.85174	1.8504	1.85034	1.86454	1.87736	1.82876	1.89316	1.88879	1.89679
Ti	0.000663754	0.00112754	0.00254509	0.00289128	0.00143069	0.00378401	0.00229782	0.0017521	0.00288841	0.00436865	0.00374449	0.00394216	0.005	0.00492958	0.0043886	0.00511183	0.00442995	0.00293292	0.00364725	0.00522849	0.00443271	0.00314282	0.00514285	0.00229555	0.00551538	0.00514466	0.00389713	0.00378741
Al	0.192561	0.199568	0.203863	0.309768	0.203786	0.202358	0.228659	0.231503	0.2981	0.334089	0.286499	0.342057	0.357006	0.359361	0.311027	0.275514	0.313226	0.229158	0.294603	0.276486	0.268295	0.27933	0.297894	0.2391	0.31595	0.192741	0.213553	0.213795
Cr	0.015218	0.0192231	0.0169353	0.0173325	0.0265762	0.0240848	0.0274076	0.0278912	0.0171772	0.0184305	0.0187115	0.0190535	0.0128756	0.00994028	0.00964083	0.00664886	0.00725541	0.00764261	0.0063857	0.0107468	0.0106862	0.00971157	0.00866345	0.00906818	0.0076347	0.00731418	0.00863651	0.00859449
Fe	0.174689	0.17469	0.17815	0.173111	0.172366	0.171381	0.173883	0.176772	0.179925	0.174251	0.184995	0.183638	0.192027	0.193843	0.197146	0.216837	0.213532	0.216808	0.215778	0.210722	0.218613	0.220101	0.212551	0.215641	0.214344	0.215	0.224131	0.221212
Mg	1.64048	1.6488	1.64522	1.60255	1.61284	1.61393	1.61278	1.61053	1.59731	1.57966	1.59099	1.58202	1.57403	1.55468	1.53453	1.58338	1.53786	1.56116	1.53206	1.56132	1.57047	1.55249	1.49079	1.57002	1.53997	1.60197	1.57373	1.56112
Mn	0	0	0	0.000245115	0.00174575	0	0	0	0.001805	0.000814993	0.00167963	0.00122914	0.0019537	0.00153088	0.00120451	0.00139596	0.0022717	0.00308242	0.00273995	0.00331466	0.0026387	0.00373999	0.00283178	0.00293563	0.00337077	0.00262656	0.00252096	0.00378572
Ca	0.077925	0.075841	0.0802718	0.077332	0.0733624	0.0752902	0.0808384	0.0756149	0.0714879	0.0726838	0.077293	0.0719604	0.0744376	0.072803	0.0733883	0.0753611	0.0790141	0.0735259	0.0746441	0.0726119	0.0712316	0.0747966	0.0787676	0.0741939	0.0801558	0.0749873	0.0723403	0.0713137
Na	0.00983089	0.0121769	0.00799939	0.00640296	0.013544	0.00924191	0.00775249	0.00961206	0.00850776	0.00738176	0.00933354	0.00908845	0.00861427	0.0102253	0.0140557	0.0156764	0.014602	0.0139168	0.0180962	0.0143124	0.0135718	0.0165334	0.0269263	0.0100798	0.011866	0.0169354	0.0147405	0.015379
K	0.000206661	0	0.000436018	5.21159e-05	0.000842573	0.000278194	0.000301601	2.21741e-05	0.000364772	0.000229589	0.000654206	0.000732463	0	0.000611594	0.000394745	0.000848868	0.000554683	0.000154742	0.000549305	0.000133003	0.00080368	0	0.000187561	0	0.000614132	0.000490597	0.000663539	0.000259557
XMg	0.903762	0.9042	0.902296	0.902509	0.903447	0.904005	0.902677	0.901096	0.898761	0.90065	0.895835	0.895995	0.891268	0.889139	0.886153	0.87955	0.878079	0.878058	0.876546	0.881086	0.877807	0.875831	0.875215	0.879237	0.877819	0.881671	0.875335	0.875886
XCr	0.0732412	0.0878608	0.0767006	0.0529881	0.115367	0.106362	0.107033	0.107525	0.0544828	0.0522823	0.0613067	0.0527636	0.0348101	0.0269164	0.0300648	0.0235639	0.0226391	0.0322745	0.0212157	0.0374149	0.0383044	0.0335992	0.0282604	0.0365405	0.0235941	0.0365608	0.03887	0.0386461
Distance = 0 marks the boundary between the partially molten pyroxenite and the reaction zone.
XMg = Mg/(Mg+Fetot). XCr = Cr/(Cr+Al). Cations are calculated on the basis of 6 oxygens and all Fe = Fe2+.
Representative major element compositions of orthopyroxene from experiment PPR7 (2 GPa, 1400°C)																																													Representative major element compositions (wt%) of orthopyroxene RIMS from experiment PPR7 (2 GPa, 1400°C)
Distance (µm)	-940	-890	-850	-780	-730	-700	-670	-640	-600	-580	-520	-480	-440	-390	-350	-290	-220	-180	-160	-130	-110	-80	-60	-50	-30	-20	0	10	50	100	160	220	280	340	380	420	490	530	580	640	690	750	830		D (µm)	-0.86	-0.77	-0.68	-0.59
SiO2	54.76	54.91	54.78	54.57	53.8	54.89	54.92	55.04	54.42	54.67	54.92	54.24	54.37	55.08	53.34	54.49	54.63	55.16	54.74	55.61	55.25	55.22	54.97	55.16	55.27	55.56	54.59	54.85	54.52	54.49	53.9	55.54	54.43	55.72	54.75	54.23	54.59	55.18	55.39	55.26	55.02	55.77	54.95		SiO2	54.56	54.71	54.48	53.81
TiO2	0.0377	0.0245	0.0442	0.0348	0.0594	0.0465	0.0421	0.0356	0.0432	0.084	0.096	0.076	0.089	0.0652	0.1059	0.0754	0.123	0.1204	0.142	0.1319	0.1273	0.1087	0.1757	0.1493	0.1302	0.0812	0.1273	0.1246	0.1491	0.1491	0.1694	0.1125	0.0628	0.1087	0.111	0.1333	0.1009	0.1448	0.116	0.1029	0.0453	0.1363	0.1175		TiO2	0.0324	0.0324	0.0446	0.0654
Al2O3	6.13	5.46	5.1	6.79	6.51	5.75	5.77	5.75	6.16	5.8	6.12	5.88	6.48	5.88	6.39	6.94	4.93	5.02	5.4	4.96	4.86	5.01	5.07	4.86	4.64	4.57	5.4	5.22	5.16	5.3	7.22	4.23	5	5.29	4.84	6.78	5.01	5.03	4.8	4.81	4.55	3.78	4.95		Al2O3	6.13	5.76	5.63	6.31
Cr2O3	0.8571	1.0135	0.9622	1.1053	0.9018	0.8669	0.98	1.02	0.9066	0.8512	1.06	0.92	0.6519	0.7781	0.8514	0.88	0.4409	0.4336	0.4249	0.4819	0.334	0.4185	0.3817	0.3885	0.3318	0.3814	0.3952	0.3134	0.4183	0.4608	0.4154	0.3217	0.3677	0.3984	0.3331	0.4197	0.3602	0.3953	0.4023	0.3366	0.3616	0.3367	0.4455		Cr2O3	0.9611	1.023	0.9622	1.0897
FeO	5.59	5.33	5.55	4.88	5	5.53	5.14	4.94	5.11	5.28	4.93	5.05	5.25	5.23	5.32	5.33	5.89	5.62	6.03	5.83	6.12	5.73	6.27	5.74	6.45	5.97	6.14	5.8	6.41	6.3	6.16	6.26	6.43	6.34	6.26	6.09	6.31	6.53	6.22	5.99	6.53	6.32	6.43		FeO	5.24	5.28	5.22	5.34
MgO	30.86	31.45	31.13	31.33	31.51	31.22	31.81	31.82	31.68	31.59	31.51	31.38	31.36	31.35	30.43	30.78	30.88	30.8	30.61	30.77	30.98	30.92	30.99	30.81	30.91	30.66	30.34	30.66	30.96	30.7	29.72	30.73	30.95	30.58	31.05	29.55	30.65	30.47	30.91	30.37	31.02	31.02	30.58		MgO	31.26	31.75	31.93	31.43
MnO	0	0	0	0.0236	0.0605	0	0.0258	0.0169	0.0214	0.0155	0.0111	0.0347	0.0103	0.0428	0	0.042	0.1288	0.0708	0.089	0.0642	0.0609	0.1128	0.0594	0.0804	0.1195	0.0251	0.0726	0.0672	0.0921	0.1256	0.123	0.1365	0.1505	0.0907	0.0935	0.1025	0.0468	0.1326	0.087	0.1261	0.1146	0.0811	0.1055		MnO	0	0	0	0.0605
CaO	1.99	1.92	2.05	1.98	1.87	1.96	1.8	1.84	1.88	1.96	1.88	2.07	1.93	1.87	2.03	2.19	2.35	2.4	2.35	2.29	2.37	2.3	2.35	2.28	2.28	2.26	2.48	2.42	2.29	2.23	2.23	2.38	2.34	2.26	2.33	2.31	2.23	2.23	2.36	2.22	2.24	2.36	2.21		CaO	1.96	1.91	1.88	1.85
Na2O	0.0981	0.1208	0.0698	0.1489	0.1036	0.0926	0.0978	0.094	0.1043	0.0967	0.1461	0.0858	0.0768	0.1184	0.1351	0.0965	0.2204	0.202	0.2256	0.1594	0.2006	0.2193	0.1605	0.1998	0.2302	0.1857	0.2033	0.1739	0.243	0.2606	0.1461	0.1537	0.2851	0.1694	0.2331	0.22	0.2006	0.2161	0.2413	0.1373	0.2258	0.1687	0.2417		Na2O	0.134	0.1211	0.0987	0.1036
K2O	0.0071	0.0071	0.0036	0	0	0.0009	0.0003	0	0	0	0	0	0.0036	0.013	0.0239	0.0059	0	0	0	0	0	0.0035	0	0	0	0	0	0	0	0	0.0045	0	0	0.0017	0	0.0116	0	0	0	0.0066	0	0.0034	0		K2O	0.0071	0.0071	0.0036	0
Total	100.317	100.247	99.666	100.866	99.864	100.357	100.273	100.179	100.346	100.347	100.159	99.6042	100.222	100.427	98.6263	101.039	99.5931	99.842	100.011	100.297	100.303	100.055	100.427	99.6796	100.362	99.6934	99.7484	99.6291	100.243	100.016	100.113	99.8644	100.016	100.959	100.001	99.8571	99.4985	100.329	100.527	99.3595	100.107	99.9836	100.137		Total	100.285	100.594	100.249	100.059
Si	1.88487	1.89091	1.89932	1.86485	1.85935	1.8885	1.89043	1.89485	1.87103	1.88045	1.89075	1.88085	1.87065	1.89018	1.86861	1.86324	1.90043	1.90934	1.89605	1.91583	1.90782	1.90831	1.89794	1.91269	1.91064	1.92596	1.89703	1.90391	1.88916	1.89096	1.86485	1.92667	1.89158	1.91069	1.89955	1.88002	1.90209	1.90795	1.9097	1.92235	1.90828	1.93292	1.90478		Si	1.87778	1.88403	1.88844	1.85969
Ti	0.000975983	0.000634626	0.00115244	0.000894542	0.00154417	0.0012034	0.00109004	0.000921889	0.00111722	0.00217332	0.00248603	0.00198235	0.00230332	0.00168302	0.00279057	0.00193934	0.00321853	0.00313486	0.00369969	0.00341807	0.00330647	0.00282562	0.00456309	0.00389414	0.00338557	0.00211725	0.00332753	0.00325326	0.00388617	0.00389202	0.00440859	0.00293552	0.00194164	0.00280376	0.00289682	0.00347604	0.00264448	0.00376604	0.00300832	0.00269258	0.00168182	0.00355336	0.00306371		Ti	0.000838776	0.000839261	0.00116287	0.00170015
Al	0.248676	0.221599	0.208402	0.273473	0.265163	0.233156	0.233094	0.205712	0.249608	0.235123	0.246819	0.239783	0.262762	0.237817	0.263828	0.279683	0.202126	0.204794	0.220442	0.201391	0.197786	0.204054	0.206309	0.198614	0.189043	0.186705	0.221162	0.213547	0.210725	0.216769	0.294406	0.17294	0.204791	0.213791	0.19791	0.277018	0.205736	0.204978	0.195043	0.197207	0.185989	0.154404	0.202226		Al	0.248648	0.233775	0.230001	0.257017
Cr	0.0233253	0.0275944	0.0263766	0.0298639	0.0246414	0.0235814	0.0265585	0.0347016	0.0246442	0.0231484	0.0286784	0.0251681	0.0177333	0.0211117	0.0235817	0.0238246	0.0121266	0.0118666	0.0116361	0.0131262	0.00911859	0.0114347	0.0104197	0.0106509	0.00906863	0.010453	0.0108581	0.00860091	0.0114598	0.0126432	0.0113631	0.00882325	0.0101031	0.0108013	0.00913731	0.0115037	0.00992287	0.0108066	0.0109663	0.00925791	0.00991579	0.00922639	0.0122096		Cr	0.0261526	0.027853	0.0263699	0.0297757
Fe	0.160911	0.153498	0.160926	0.139465	0.144512	0.159113	0.147962	0.142226	0.146926	0.151881	0.141941	0.146447	0.151059	0.150096	0.155859	0.152417	0.171353	0.162687	0.17467	0.167969	0.176731	0.165601	0.181042	0.166452	0.186468	0.173067	0.178437	0.168365	0.185749	0.182837	0.178235	0.181606	0.186876	0.181813	0.181634	0.176562	0.183867	0.188823	0.179342	0.174263	0.189405	0.183183	0.186399		Fe	0.150819	0.152058	0.151319	0.154339
Mg	1.58325	1.61427	1.60876	1.59583	1.62316	1.60101	1.63203	1.6328	1.62347	1.61956	1.61691	1.62189	1.60821	1.60355	1.58892	1.56875	1.60115	1.58908	1.58032	1.58004	1.59449	1.59268	1.59482	1.59238	1.59266	1.58413	1.57149	1.58627	1.599	1.58796	1.53264	1.58891	1.60318	1.56297	1.6057	1.52692	1.59178	1.57033	1.58843	1.57472	1.60361	1.60247	1.57997		Mg	1.60359	1.62967	1.64968	1.61904
Mn	0	0	0	0.000683106	0.001771	0	0.000752205	0.000492799	0.000623193	0.000451575	0.000323677	0.00101918	0.000300162	0.00124406	0	0.00121643	0.00379509	0.00207577	0.00261109	0.00187338	0.00178118	0.00330178	0.00173711	0.00236136	0.00349899	0.00073696	0.0021369	0.00197571	0.00270308	0.00369183	0.00360451	0.00401069	0.00443005	0.00263434	0.00274767	0.00300977	0.00138118	0.00388342	0.00254062	0.00371555	0.00336661	0.00238078	0.00309753		Mn	0	0	0	0.001771
Ca	0.0733889	0.0708403	0.0761532	0.0724959	0.0692434	0.0722503	0.0663837	0.0678693	0.0692531	0.0722316	0.0693458	0.0769065	0.0711456	0.068756	0.0761937	0.0802332	0.0875885	0.0890081	0.0872111	0.0845275	0.0876822	0.0851607	0.0869325	0.0847058	0.0844466	0.0839366	0.0903361	0.0900001	0.0850172	0.0829144	0.0826644	0.0884578	0.0871286	0.0830321	0.0866127	0.0858013	0.0832493	0.0826129	0.0871777	0.0827434	0.0832393	0.087636	0.0820783		Ca	0.0722743	0.0704713	0.0698204	0.0685028
Na	0.00654684	0.0080655	0.00469219	0.00986572	0.00694196	0.00617703	0.006527	0.00627435	0.00695267	0.00644886	0.0097521	0.00576854	0.00512316	0.00787782	0.00917623	0.00639768	0.0148654	0.0135567	0.0151506	0.0106472	0.0134301	0.0146939	0.0107442	0.0134326	0.015429	0.0124807	0.0136976	0.0117034	0.0163254	0.0175342	0.00980052	0.0103376	0.01921	0.0112626	0.0156803	0.0147873	0.0135517	0.0144872	0.0161301	0.00926055	0.0151841	0.0113363	0.0162442		Na	0.00894167	0.00808553	0.00663326	0.00694196
K	0.000311746	0.000311891	0.000159222	0	0	3.94995e-05	1.31727e-05	0	0	0	0	0	0.000158001	0.000569086	0.00106804	0.000257352	0	0	0	0	0	0.000154293	0	0	0	0	0	0	0	0	0.000198606	0	0	7.43622e-05	0	0.000512986	0	0	0	0.00029288	0	0.000150319	0		K	0.000311711	0.000311891	0.000159181	0
XMg	0.907743	0.913168	0.909065	0.91963	0.918247	0.909601	0.916875	0.919874	0.917009	0.914262	0.919299	0.917184	0.914135	0.914409	0.910671	0.911446	0.903327	0.90713	0.900472	0.903908	0.900221	0.905816	0.898054	0.905362	0.895191	0.90151	0.898032	0.904045	0.895924	0.896749	0.895822	0.897427	0.895603	0.895797	0.898377	0.896352	0.896451	0.892663	0.898549	0.900363	0.894365	0.897414	0.894473		XMg	0.914034	0.914657	0.915981	0.912969
XCr	0.0857543	0.110735	0.112347	0.0984513	0.0850275	0.0918503	0.102	0.104	0.0898598	0.0896281	0.104	0.095	0.0632215	0.0815348	0.0820492	0.078	0.0565993	0.0547703	0.0501389	0.0611893	0.0440715	0.053064	0.0480771	0.0508968	0.0457753	0.0530186	0.0467983	0.038717	0.0515777	0.0551111	0.0371624	0.0485425	0.0470145	0.0480928	0.0441316	0.0398713	0.046012	0.0500804	0.0532322	0.0448401	0.0506152	0.0563856	0.0569383		XCr	0.0951694	0.106461	0.102858	0.103823
Distance = 0 marks the boundary between the partially molten pyroxenite and the reaction zone.																																													Distance = 0 marks the boundary between the partially molten pyroxenite and the reaction zone.
XMg = Mg/(Mg+Fetot). XCr = Cr/(Cr+Al). Cations are calculated on the basis of 6 oxygens and all Fe = Fe2+.																																													XMg = Mg/(Mg+Fetot). XCr = Cr/(Cr+Al). Cations are calculated on the basis of 6 oxygens and all Fe = Fe2+.
Representative major element compositions of orthopyroxene from experiment PPR8 (2 GPa, 1450°C)
Distance (µm)
SiO2	54.96	54.88	54.75	55.11	55.05	54.92	55.08	54.83	55.6	55	55.33	55.23
TiO2	0.0518	0.0365	0.0031	0.0866	0.0778	0.0678	0.0966	0.0855	0.0768	0.0566	0.0589	0.0833
Al2O3	5.76	5.88	5.35	4.58	4.72	4.62	4.58	4.25	4.83	4.36	5.12	4.45
Cr2O3	1.23	1.43	1.15	1.28	1.22	1.31	1.29	1.26	1.26	1.33	1.41	1.27
FeO	4.27	4.41	4.88	4.05	4.11	4.24	4.15	4.21	4.05	4.16	4.11	4.28
MgO	33.05	31.89	32.93	33.39	33.41	33.25	33.44	33.56	33.36	33.67	34.02	33.24
MnO	0	0	0	0.0534	0.033	0.024	0.0334	0.043	0.012	0.034	0.045	0.0144
CaO	2.34	2.26	2.06	1.98	2.21	1.96	2.06	2.04	2.22	2.11	2.11	2.05
Na2O	0.045	0.0799	0.0915	0.0642	0.0324	0.0112	0.0223	0.0112	0.0143	0.0233	0.0098	0.056
K2O	0.0155	0	0.0024	0	0	0	0	0	0	0	0	0
Total	101.722	100.866	101.217	100.594	100.863	100.403	100.752	100.29	101.423	100.744	102.214	100.674
Si	1.86241	1.87453	1.86825	1.88536	1.87983	1.88357	1.88252	1.88401	1.88603	1.8819	1.86577	1.88975
Ti	0.00132035	0.000937782	7.95693e-05	0.00222851	0.00199836	0.00174909	0.00248344	0.00220985	0.0019596	0.00145674	0.00149398	0.0021439
Al	0.230042	0.236706	0.215159	0.184665	0.189958	0.186744	0.184487	0.172111	0.193097	0.175823	0.20348	0.17945
Cr	0.0329542	0.038618	0.0310261	0.0346219	0.0329381	0.0355221	0.0348587	0.0342304	0.0337925	0.0359801	0.0375918	0.0343565
Fe	0.121008	0.125971	0.139261	0.115871	0.117371	0.121611	0.118618	0.120977	0.114891	0.119037	0.115903	0.12247
Mg	1.66931	1.62355	1.67486	1.70261	1.70049	1.69972	1.70352	1.71878	1.68669	1.71717	1.70989	1.69521
Mn	0	0	0	0.00154736	0.000954469	0.000697185	0.00096689	0.00125146	0.000344779	0.000985369	0.00128528	0.000417327
Ca	0.0849579	0.0827074	0.0753144	0.0725751	0.0808561	0.072022	0.0754346	0.0751022	0.0806836	0.0773526	0.0762322	0.0751521
Na	0.00295656	0.00529137	0.00605365	0.00425837	0.00214512	0.000744754	0.00147773	0.000746151	0.00094049	0.00154573	0.000640719	0.00371502
K	0.000670016	0	0.000104469	0	0	0	0	0	0	0	0	0
XMg	0.93241	0.927997	0.923235	0.936281	0.935435	0.93323	0.934902	0.934243	0.936228	0.935172	0.936519	0.932623
XCr	0.125303	0.140264	0.126027	0.157884	0.147773	0.159818	0.158922	0.165892	0.148938	0.169875	0.155936	0.16069
Distance = 0 marks the boundary between the partially molten pyroxenite and the reaction zone.
XMg = Mg/(Mg+Fetot). XCr = Cr/(Cr+Al). Cations are calculated on the basis of 6 oxygens and all Fe = Fe2+.
[truncated: 31 more columns]

## Sheet: Table S6
Supplementary Table 6
Representative major element compositions (wt%) of clinopyroxene from experiment PPR1 (2 GPa, 1300°C)																																			Representative major element compositions (wt%) of clinopyroxene RIMS from experiment PPR1 (2 GPa, 1300°C)
Distance (µm)	-940	-820	-750	-680	-620	-500	-490	-420	-360	-320	-270	-230	-250	-240	-240	-150	-140	-130	-120	-120	-100	-90	30	110	170	250	320	440	530	660	770	880	960		D (µm)	-0.89	-0.81	-0.72	-0.66	-0.59	-0.51	-0.45	-0.37	-0.29	-0.24	-0.16	-0.11	-0.08	-0.01
SiO2	51.94	51.27	52.44	52.66	52.2	52.59	52.35	52.46	52.2	52.2	52.46	51.13	52.15	51.7	52.2	51.65	51.53	51.65	51.84	51.25	51.22	51.24	51.41	52.24	52.01	52.02	52.06	51.66	52.08	53.02	51.45	53.07	51.73		SiO2	51.94	52.44	52.66	52.2	52.35	52.2	52.2	52.44	52.46	51.13	51.7	51.65	51.65	51.84
TiO2	0.03	0.03	0.04	0.02	0.02	0.05	0.05	0.04	0.06	0.04	0.04	0.06	0.03	0.13	0.07	0.1112	0.17	0.1581	0.17	0.1581	0.16	0.19	0.32	0.522	0.5159	0.3835	0.44	0.4502	0.4503	0.3545	0.4282	0.3549	0.4789		TiO2	0.032	0.035	0.02	0.041	0.044	0.059	0.041	0.039	0.05	0.07	0.1133	0.1144	0.1678	0.22
Al2O3	7.98	8.68	7.83	7.28	7.94	7.63	7.71	8.04	8	8	8.04	8.86	7.71	8.15	7.64	7.84	8.86	8.05	7.87	7.74	7.55	7.59	9.22	9.14	8.77	8.23	7.39	8.1	7.46	7.41	7.84	7.37	8.41		Al2O3	7.98	7.83	7.28	7.94	7.71	8	8	7.83	8.04	8.46	8.01	7.84	8.05	7.87
Cr2O3	0.94	0.89	0.88	0.73	0.79	0.79	0.77	0.79	0.82	0.82	0.79	0.82	0.77	0.72	0.79	0.6464	0.76	0.6464	0.62	0.61	0.58	0.57	0.5383	0.3205	0.2651	0.3259	0.3044	0.307	0.441	0.3252	0.3979	0.3309	0.2978		Cr2O3	0.9112	0.8611	0.7889	0.8123	0.7922	0.8567	0.8183	0.8111	0.8234	0.82	0.7889	0.7464	0.6764	0.62
FeO	3.61	3.73	3.79	3.44	3.81	3.43	3.89	3.61	3.82	3.88	3.91	4.43	4.15	4.15	4.11	4.58	4.52	4.68	4.81	4.78	4.92	5.08	5.09	6.01	6.05	6.33	6.76	6.42	6.59	6.72	6.38	6.4	6.49		FeO	3.61	3.59	3.54	3.71	3.79	3.82	3.88	3.89	3.91	4.43	4.35	4.58	4.98	5.14
MgO	18.57	18.75	18.88	18.11	19.08	17.83	19.05	18.56	18.83	18.83	18.56	19.68	18.95	19.23	18.58	19.06	18.32	19.02	18.33	19.06	18.95	18.85	17.32	19.07	18.99	19.75	21.22	20.03	20.42	21.12	19.99	20.23	20.44		MgO	18.37	18.88	18.11	19.08	19.05	18.83	18.83	18.68	18.56	19.68	19.01	19.06	18.83	18.33
MnO	0.01	0.05	0	0.01	0	0	0	0.03	0.01	0.01	0.03	0.03	0	0.02	0	0.088	0.05	0.088	0.03	0.088	0.077	0.098	0.0732	0.0901	0.137	0.1268	0.1246	0.1223	0.2	0.0661	0.1299	0.0838	0.1814		MnO	0.01	0	0.01	0	0	0.01	0.01	0	0.03	0.03	0.02	0.088	0.088	0.03
CaO	16.71	16.64	16.22	16.66	16.07	16.67	16.12	16.47	16.03	16.03	16.47	14.51	16.52	16.1	16.57	15.11	14.91	15.11	15.96	15.21	15.04	14.89	15.57	12.12	12.08	10.44	10.04	10.67	11.11	10.16	10.56	10.64	10.02		CaO	16.71	16.22	16.66	16.07	16.12	16.03	16.03	16.22	16.47	14.51	16.1	15.11	15.11	15.96
Na2O	1.05	1.04	0.97	0.96	1	1.05	0.94	0.91	0.94	0.94	0.91	0.81	0.94	0.71	1	0.8159	0.8	0.8159	0.77	0.8159	0.778	0.678	1.0947	1.1295	1.1828	1.1204	1.0417	1.0944	1.0413	0.9171	1.1306	1.0922	1.1175		Na2O	0.922	0.9664	0.9445	0.922	0.955	0.9221	0.9113	0.9321	0.895	0.8244	0.7445	0.8235	0.789	0.813
K2O	0	0	0.01	0.02	0.01	0.01	0.01	0.01	0.01	0.01	0.01	0	0.01	0	0.01	0.014	0.01	0.014	0.01	0.014	0.023	0.023	0.0155	0.0093	0.02	0	0.0063	0	0	0	0.017	0.0037	0.0056		K2O	0	0.01	0.02	0.01	0.01	0.01	0.01	0.01	0.01	0	0	0.014	0.014	0.01
Total	100.84	101.1	101.15	99.9	101.01	100.05	100.89	100.96	100.73	100.77	101.26	100.39	101.23	100.93	101.06	100.004	99.95	100.321	100.41	99.8142	99.301	99.2324	100.698	100.651	100.094	98.7361	99.401	98.9074	99.7926	100.12	98.3236	99.5755	99.1712		Total	100.485	100.832	100.033	100.785	100.821	100.738	100.731	100.852	101.248	99.9544	100.837	100.026	100.355	100.833
Si	1.84648	1.82081	1.85591	1.88334	1.85003	1.8781	1.85688	1.85802	1.85352	1.8533	1.85528	1.82142	1.84905	1.83592	1.85456	1.85051	1.84275	1.84537	1.85357	1.84361	1.85103	1.85281	1.83428	1.85011	1.85467	1.87267	1.86621	1.86112	1.86468	1.88225	1.86483	1.89386	1.85555		Si	1.84648	1.85591	1.88334	1.85003	1.85688	1.85352	1.8533	1.85826	1.85528	1.82142	1.83592	1.85051	1.84537	1.85357
Ti	0.000802225	0.000801408	0.00106484	0.000538035	0.000533174	0.00134313	0.00133404	0.00106565	0.00160255	0.00106824	0.00106407	0.00160774	0.000800107	0.00347247	0.00187068	0.00299679	0.00457286	0.00424891	0.0045722	0.00427797	0.00434937	0.00516782	0.00858815	0.0139059	0.0138381	0.0103846	0.0118642	0.0122	0.0121274	0.00946639	0.0116743	0.00952657	0.0129213		Ti	0.000855707	0.000931739	0.000538035	0.00109301	0.00117395	0.00157584	0.00109494	0.00103954	0.00133009	0.0018757	0.00302639	0.00308303	0.00450959	0.00591696
Al	0.33435	0.363308	0.326596	0.306856	0.331652	0.321141	0.322312	0.335609	0.33479	0.33475	0.335113	0.371983	0.322184	0.341095	0.319903	0.331048	0.373418	0.338973	0.331645	0.328148	0.321571	0.323459	0.387707	0.381502	0.368582	0.349177	0.312216	0.343923	0.314794	0.310034	0.334907	0.309971	0.355534		Al	0.33435	0.326596	0.306856	0.331652	0.322312	0.33479	0.33475	0.32701	0.335113	0.355189	0.335236	0.331048	0.338973	0.331645
Cr	0.0264209	0.0249901	0.0246237	0.0206418	0.0221366	0.0223059	0.0215941	0.0221221	0.0230207	0.0230179	0.0220894	0.0230954	0.0215855	0.0202149	0.0221909	0.0183104	0.0214881	0.0182596	0.0175272	0.0173493	0.0165722	0.0162957	0.0151852	0.00897429	0.00747424	0.00927582	0.00862734	0.00874452	0.0124839	0.00912775	0.0114026	0.00933625	0.00844563		Cr	0.0256114	0.0240949	0.0223073	0.0227615	0.0222166	0.024051	0.0229702	0.0227246	0.0230233	0.0230954	0.0221494	0.0211431	0.0191071	0.0175272
Fe	0.107326	0.110781	0.112173	0.102888	0.112925	0.102439	0.115391	0.106927	0.113435	0.115203	0.115641	0.131976	0.123055	0.123244	0.122115	0.137228	0.135177	0.139835	0.143829	0.1438	0.148695	0.153618	0.151877	0.178003	0.180423	0.190569	0.202655	0.193425	0.197322	0.199509	0.193388	0.191001	0.194685		Fe	0.107326	0.106254	0.105879	0.109961	0.112425	0.113435	0.115203	0.115279	0.115641	0.131976	0.129184	0.137228	0.148799	0.153696
Mg	0.98399	0.992515	0.995937	0.965389	1.00791	0.94908	1.00716	0.979797	0.996582	0.996464	0.978348	1.04495	1.00147	1.01784	0.983901	1.01784	0.97649	1.01288	0.976882	1.02196	1.02075	1.01594	0.921088	1.00666	1.00935	1.05973	1.1338	1.07557	1.08974	1.11755	1.07995	1.07604	1.09282		Mg	0.973392	0.995937	0.965389	1.00791	1.00716	0.996582	0.996464	0.986635	0.978348	1.04495	1.00619	1.01784	1.00277	0.976882
Mn	0.000301113	0.00150403	0	0.000302925	0	0	0	0.000899974	0.000300755	0.00030072	0.000898643	0.000905193	0	0.00060156	0	0.00267048	0.00151448	0.00266307	0.000908556	0.00268128	0.00235696	0.00300147	0.00221215	0.00270275	0.00413797	0.00386631	0.0037832	0.00373193	0.00606526	0.00198758	0.00398794	0.00253296	0.0055113		Mn	0.000301113	0	0.000302925	0	0	0.000300755	0.00030072	0	0.000898643	0.000905193	0.00060156	0.00267048	0.00266307	0.000908556
Ca	0.636471	0.633159	0.615041	0.638384	0.610214	0.637838	0.612619	0.624993	0.609845	0.609773	0.624068	0.553809	0.627572	0.612558	0.630742	0.58002	0.571272	0.578412	0.611415	0.586222	0.582346	0.576867	0.595203	0.459893	0.461536	0.402671	0.385609	0.411855	0.426193	0.386446	0.410087	0.406817	0.385085		Ca	0.636471	0.615041	0.638384	0.610214	0.612619	0.609845	0.609773	0.61582	0.624068	0.553809	0.612558	0.58002	0.578412	0.611415
Na	0.072373	0.0716108	0.0665596	0.0665678	0.068715	0.0727026	0.0646456	0.0624897	0.0647142	0.0647065	0.0623973	0.0559453	0.0646201	0.0488839	0.0688834	0.0566763	0.0554678	0.0565191	0.0533801	0.0569057	0.0545128	0.0475331	0.0757282	0.0775579	0.0817779	0.0782004	0.0724006	0.0764436	0.0722859	0.0631245	0.0794524	0.0755693	0.0777181		Na	0.0635504	0.0663125	0.065493	0.0633553	0.0656772	0.0634819	0.0627309	0.06404	0.0613688	0.0569399	0.0512592	0.0572042	0.0546557	0.0563611
K	0	0	0.000451459	0.000912436	0.000452097	0.000455555	0.000452471	0.000451801	0.000452951	0.000452898	0.000451133	0	0.000452292	0	0.000453205	0.000639841	0.000456174	0.000638067	0.000456109	0.000642431	0.00106029	0.0010609	0.000705463	0.000420148	0.000909776	0	0.000288085	0	0	0	0.000786008	0.000168432	0.000256238		K	0	0.000451459	0.000912436	0.000452097	0.000452471	0.000452951	0.000452898	0.000452031	0.000451133	0	0	0.000639841	0.000638067	0.000456109
XMg	0.901654	0.899591	0.898771	0.903688	0.899249	0.90258	0.897206	0.901606	0.897808	0.896369	0.894294	0.887864	0.890572	0.891993	0.88959	0.881195	0.878402	0.878691	0.871663	0.876647	0.87285	0.868653	0.858451	0.849744	0.848355	0.847581	0.848363	0.847576	0.846689	0.848519	0.848124	0.849255	0.848789		XMg	0.90069	0.903597	0.901165	0.901634	0.899583	0.897808	0.896369	0.895383	0.894294	0.887864	0.886219	0.881195	0.870786	0.864055
XCr	0.0732347	0.0643579	0.0701092	0.0630289	0.0625702	0.0649472	0.0627906	0.0618401	0.0643376	0.0643376	0.0618401	0.0584577	0.0627906	0.055949	0.0648677	0.0524115	0.0544131	0.0511142	0.0501964	0.0502153	0.0490094	0.0479633	0.0376904	0.022983	0.0198753	0.0258774	0.0268896	0.0247954	0.0381445	0.0285991	0.032926	0.0292391	0.0232036		XCr	0.0711505	0.0687069	0.0677697	0.064223	0.0644842	0.0670241	0.0642128	0.0649766	0.0642865	0.0610529	0.0619762	0.060033	0.0533598	0.0501964
Distance = 0 marks the boundary between the partially molten pyroxenite and the reaction zone.																																			Distance = 0 marks the boundary between the partially molten pyroxenite and the reaction zone.
XMg = Mg/(Mg+Fetot). XCr = Cr/(Cr+Al). Cations are calculated on the basis of 6 oxygens and all Fe = Fe2+.																																			XMg = Mg/(Mg+Fetot). XCr = Cr/(Cr+Al). Cations are calculated on the basis of 6 oxygens and all Fe = Fe2+.
Representative major element compositions of clinopyroxene from experiment PPR2 (2 GPa, 1350°C)
Distance (µm)	-1140	-1040	-1110	-1000	-950	-880	-790	-720	-660	-580	-520	-470	-380	-320	-260	-240	-210	-230	-180	-190	-200	-160	-180	-150	20	80	110	170	250	310	370	420	520	590	640	720	780	880	960	1070
SiO2	52.581	52.78	51.9996	52.4484	52.2852	51.9078	52.4178	51.969	52.071	52.1322	52.1118	53.4376	53.1624	52.53	52.071	52.5096	52.326	52.1526	51.8874	51.9588	51.9486	51.2244	52.2342	52.5402	52.4688	52.11	52.4688	52.88	52.6626	52.0302	52.21	52.66	52.57	52.4586	52.1526	52.48	53.1726	52.2444	51.9282	53.0196
TiO2	0.04	0.057936	0.04	0.03	0.02601	0.054774	0.02	0.070278	0.05	0.064056	0.051816	0.03	0.03	0.02	0.064056	0.04	0.022848	0.153612	0.201348	0.033558	0.054876	0.14637	0.05	0.11	0.263874	0.28	0.263874	0.40902	0.35088	0.299574	0.315996	0.263976	0.216444	0.336702	0.3009	0.23664	0.312834	0.406164	0.303654	0.299166
Al2O3	7.6296	6.99	7.4052	7.8846	7.191	8.227	7.9356	7.6296	8.5782	7.9152	7.8132	7.13	6.8444	7.3644	7.7928	6.99	7.144	8.466	8.4864	7.6806	8.0988	8.8128	7.02	7.1298	8.7108	8.66	8.58	7.8132	8.1498	8.9148	8.28	7.55	7.46	8.6088	8.4456	7.21	8.211	8.2314	8.364	7.7622
Cr2O3	1.04672	1.10384	0.888828	0.992154	0.916062	0.80172	0.890256	1.0202	0.855168	0.90984	1.04162	0.86	0.72	0.966246	0.790704	0.68	0.71	0.64311	0.62067	0.81	0.62934	0.643416	0.66	0.55	0.579972	0.55	0.52	0.32079	0.264792	0.313548	0.391578	0.23664	0.305388	0.447474	0.374748	0.232458	0.325788	0.360366	0.315996	0.252042
FeO	3.6312	3.5802	3.468	3.7944	3.723	3.9576	3.4782	3.5394	3.825	3.621	3.9984	4.4064	3.978	3.5904	3.7434	4.3044	3.94	4.284	4.1412	4.35	4.66	4.68	4.22	4.79	5.72	5.72	5.72	6.51	6.324	6.74	6.62	6.78	6.55	6.8136	6.48	6.68	6.72	6.2934	6.66	6.54
MgO	18.4824	19.227	18.207	19.7778	18.7374	19.4004	18.8904	18.462	19.8186	19.2372	20.4918	22.3992	20.3694	18.6864	19.0638	21.2262	18.8598	20.6856	19.7472	18.66	20.23	19.84	18.85	18.7476	20.4204	20.55	20.66	21.89	21.828	21.88	21.65	21.98	22.8174	22.134	21.5016	23.07	22.12	22.0014	21.88	22.6236
MnO	0	0	0	0.005916	0	0	0	0	0	0.020196	0	0.053754	0	0	0.020094	0.04029	0	0	0	0	0.02091	0.010404	0.022338	0	0.127398	0.127398	0.11	0.105468	0.107916	0.107202	0.096084	0.112404	0.156468	0.066912	0.0816	0.101796	0.156264	0.128826	0.074052	0.150246
CaO	16.014	16.6056	16.6668	15.0756	15.7998	14.5146	16.1262	15.8712	14.3616	15.6468	13.8108	12.7194	14.5146	15.81	15.759	13.8108	16.1262	13.413	14.79	16.014	13.362	13.872	15.453	15.5448	10.965	10.68	10.88	9.6084	9.0678	9.0474	8.6904	8.82	8.7414	8.211	8.8638	7.2	8.5986	9.0984	8.4966	9.0678
Na2O	0.96	0.79	0.882606	0.76245	0.831402	0.897396	0.958392	0.8466	0.794886	0.740724	0.841704	0.734706	0.891174	0.924	0.8058	0.869754	0.794682	0.758778	0.767958	0.864144	0.70635	0.768978	0.803454	0.910656	0.889	0.82	0.87	0.976	1.00225	0.916	0.900864	0.828138	0.868938	0.934116	0.986034	0.774384	0.946662	0.837216	0.988278	0.843846
K2O	0	0	0	0	0	0	0	0	0	0	0	0	0	0	0	0	0	0	0	0	0	0	0	0	0	0	0	0	0	0	0	0	0	0	0	0	0	0	0	0
Total	100.398	101.135	99.5831	100.774	99.5129	99.7747	100.722	99.4083	100.405	100.292	100.161	101.771	100.51	99.8995	100.158	100.471	99.9235	100.623	100.642	100.371	99.7109	99.9984	99.313	100.391	100.248	99.5999	100.163	100.513	99.758	100.289	99.1781	99.2312	99.7186	100.011	99.2539	98.0275	100.564	99.6016	99.0108	100.594
Si	1.87082	1.86806	1.86852	1.85539	1.87641	1.85329	1.8585	1.86665	1.84503	1.85483	1.85177	1.86408	1.88267	1.87661	1.85726	1.86254	1.87311	1.84241	1.83885	1.85619	1.85407	1.8282	1.87987	1.87594	1.85793	1.85616	1.85881	1.86668	1.86773	1.84072	1.86367	1.87932	1.86783	1.8556	1.86064	1.88669	1.8704	1.85698	1.857	1.867
Ti	0.00107052	0.00154242	0.00108116	0.000798283	0.000702135	0.00147101	0.00053339	0.00189876	0.00133263	0.00171431	0.00138499	0.000787174	0.00079914	0.000537439	0.00171857	0.00106723	0.000615214	0.00408195	0.00536739	0.00090176	0.00147321	0.00392944	0.00135355	0.00295428	0.00702841	0.00750211	0.00703171	0.0108606	0.00936054	0.00797203	0.00848454	0.00708625	0.00578463	0.00895872	0.00807497	0.00639921	0.00827737	0.0108593	0.00816809	0.00792412
Al	0.319933	0.291578	0.31361	0.328729	0.304153	0.346183	0.331602	0.322979	0.358227	0.331905	0.327216	0.293131	0.285667	0.31007	0.327585	0.292212	0.301399	0.352488	0.354456	0.32338	0.340664	0.370694	0.297759	0.300027	0.363531	0.363552	0.358241	0.325059	0.340653	0.371706	0.348337	0.317557	0.312387	0.358894	0.355118	0.30549	0.340406	0.344823	0.352516	0.322142
Cr	0.029445	0.0308892	0.0252518	0.0277498	0.0259926	0.0226313	0.024956	0.0289722	0.0239572	0.025594	0.0292643	0.0237188	0.0201595	0.0272918	0.022298	0.01907	0.0200947	0.0179628	0.0173909	0.0228784	0.0177588	0.0181558	0.0187799	0.0155263	0.0162373	0.0154894	0.0145651	0.00895316	0.00742493	0.00877029	0.0110512	0.00667706	0.00857882	0.0125145	0.0105707	0.00660736	0.00906063	0.0101272	0.00893445	0.00701709
Fe	0.108046	0.105971	0.104216	0.112254	0.111737	0.118168	0.103132	0.106317	0.113343	0.107741	0.118821	0.128546	0.117812	0.107267	0.11166	0.127684	0.11795	0.126566	0.122735	0.12996	0.139089	0.139685	0.127011	0.143027	0.169387	0.170391	0.169467	0.192184	0.187568	0.199411	0.197619	0.202351	0.194624	0.201559	0.193338	0.200835	0.197684	0.187072	0.199177	0.192593
Mg	0.980159	1.01431	0.975151	1.04284	1.00229	1.03242	0.998296	0.988399	1.04669	1.02017	1.08534	1.16462	1.07519	0.995012	1.01349	1.12221	1.00628	1.08922	1.0431	0.993597	1.07617	1.05542	1.01116	0.99772	1.07778	1.09104	1.09093	1.15175	1.15388	1.15376	1.15188	1.16919	1.20837	1.16698	1.14339	1.2362	1.15976	1.16561	1.16625	1.18742
Mn	0	0	0	0.000177263	0	0	0	0	0	0.000608623	0	0.00158824	0	0	0.000607056	0.00121046	0	0	0	0	0.000632108	0.000314509	0.000680931	0	0.003821	0.00384364	0.00330074	0.00315345	0.00324177	0.00321234	0.00290504	0.00339772	0.0047088	0.00200474	0.00246583	0.00309973	0.00465577	0.00387844	0.00224302	0.00448122
Ca	0.610465	0.629703	0.641666	0.571396	0.607518	0.555231	0.612595	0.610782	0.545217	0.59646	0.52581	0.475383	0.550724	0.605143	0.602231	0.52486	0.618496	0.507686	0.561579	0.612945	0.510953	0.53045	0.59586	0.594664	0.416003	0.40759	0.412972	0.363403	0.344565	0.342938	0.332364	0.337247	0.332765	0.311188	0.338817	0.277331	0.324066	0.34649	0.325547	0.342112
Na	0.0662244	0.0542118	0.0614907	0.0522949	0.0578501	0.062121	0.0658825	0.0589577	0.0546081	0.0510973	0.0579902	0.0496908	0.0611895	0.0640006	0.0557247	0.0598145	0.0551549	0.0519721	0.0527674	0.0598541	0.0488782	0.0532114	0.0560633	0.0630415	0.0610344	0.0566307	0.059758	0.0667995	0.0689179	0.0628308	0.0623474	0.0573017	0.0598593	0.0640639	0.0682061	0.0539768	0.0645633	0.0576965	0.0685225	0.0576122
K	0	0	0	0	0	0	0	0	0	0	0	0	0	0	0	0	0	0	0	0	0	0	0	0	0	0	0	0	0	0	0	0	0	0	0	0	0	0	0	0
XMg	0.900712	0.905407	0.903447	0.902818	0.8997	0.897298	0.906365	0.902881	0.902293	0.904478	0.901325	0.900596	0.901247	0.902686	0.90076	0.897844	0.895084	0.895898	0.894724	0.884332	0.885548	0.883119	0.888408	0.87462	0.864182	0.864923	0.865545	0.857	0.860175	0.852634	0.853561	0.852464	0.86128	0.85272	0.855364	0.860244	0.85437	0.861703	0.854128	0.860441
XCr	0.0842783	0.0957903	0.0745195	0.0778441	0.0787307	0.0613622	0.0699913	0.0823188	0.0626849	0.0715919	0.0820924	0.0748582	0.065918	0.0808977	0.0637299	0.0612629	0.0625041	0.0484889	0.0467689	0.0660731	0.049547	0.046691	0.0593289	0.0492034	0.0427557	0.0408645	0.0390688	0.0268049	0.0213312	0.0230508	0.03075	0.0205933	0.0267282	0.0336947	0.0289063	0.0211708	0.025927	0.0285313	0.0247184	0.0213182
Distance = 0 marks the boundary between the partially molten pyroxenite and the reaction zone.
XMg = Mg/(Mg+Fetot). XCr = Cr/(Cr+Al). Cations are calculated on the basis of 6 oxygens and all Fe = Fe2+.
Representative major element compositions of clinopyroxene from experiment PPR3 (2 GPa, 1380°C)
Distance (µm)	-1000	-960	-890	-850	-790	-760	-690	-650	-600	-560	-510	-460	-390	-370	-310	-220	-310	-160	-260	-40	110	160	300	50	340	490	520	570	610	660	710	790	880	920	410
SiO2	51.24	51.99	52.33	52.9	52.55	52.43	51.77	52.39	52.29	51.8	52.6	51.86	51.76	51.56	51.64	51.19	51.42	52.52	51	50.92	51.57	52.82	51.54	52.39	52.02	51.75	51.92	52.14	52.15	51.34	53.05	52.34	51.45	52.02	52.21
TiO2	0.17	0.11	0.17	0.13	0.11	0.18	0.11	0.12	0.15	0.19	0.18	0.2179	0.1467	0.13	0.142	0.28	0.32	0.2813	0.2398	0.3896	0.3331	0.2891	0.2881	0.2504	0.3207	0.3581	0.3234	0.2862	0.3437	0.3457	0.3048	0.2863	0.2974	0.3255	0.3522
Al2O3	8.36	7.42	7.05	5.85	6.17	6.63	7.36	6.58	6.74	7.49	6.21	7.83	8.16	7.47	7.83	8.44	8.78	7.23	8.66	8.93	7.63	7.35	8.81	6.51	7.88	7.67	8.58	8.22	8.23	9.07	6.79	8.04	7.65	7.37	8.05
Cr2O3	1.234	1.071	1.2545	1.0744	1.1346	1.11	1.1249	1.1005	1.0804	0.9202	0.8924	0.8964	0.9174	0.943	0.8299	0.798	0.6502	0.4597	0.4474	0.4478	0.455	0.3875	0.307	0.4326	0.3924	0.3777	0.3516	0.4082	0.4521	0.3955	0.4973	0.4789	0.4687	0.5063	0.369
FeO	3.51	3.52	3.6	3.76	3.64	3.87	3.63	3.99	3.51	3.78	3.84	3.78	3.91	4.62	4.24	4.22	4.3	4.72	4.66	4.54	4.72	4.75	5.22	4.93	5.26	4.99	5.51	5.75	5.84	5.55	5.38	5.72	5.25	5.28	5.12
MgO	18.05	18.18	18.77	18.89	18.98	18.92	18.84	19.29	19.02	18.66	19.33	18.11	18.5	21.75	19.44	18.06	18.56	19.56	19.89	18.61	19.15	19.08	20.08	19.72	19.63	18.94	18.95	20.16	20.28	19.65	19.71	20.54	18.83	18.99	18.85
MnO	0.0836	0.0209	0	0	0.0101	0.0247	0	0	0.0023	0	0.0209	0.007	0.0548	0.0394	0.0147	0.0379	0.0347	0.1152	0.0526	0.1168	0.0649	0.0604	0.0835	0.0634	0.1112	0.1268	0.1066	0.1437	0.1081	0.0866	0.0913	0.1453	0.116	0.116	0.065
CaO	17.53	17.56	17.65	17.52	17.1	16.61	17.18	16.16	17.05	17.14	16.58	17.48	16.6	14.07	15.93	15.3	14.45	15.08	14.25	14.98	14.85	15.22	12.58	14.69	13.9	14.52	13.48	12.29	12.28	12.82	14.13	12.11	13.78	14.42	14.14
Na2O	0.9937	0.7591	0.7634	0.8969	0.7966	0.7576	0.9679	0.8135	0.7893	0.7089	0.7049	0.798	0.8196	0.8102	0.799	0.9938	1.0439	1.0434	0.9107	1.1144	1.0153	1.1343	1.2428	1.1038	1.1464	1.1753	1.2411	1.1127	1.1084	1.2787	1.105	1.2901	1.1717	1.156	1.1811
K2O	0.0304	0.0177	0.0164	0	0.0179	0.0019	0	0.0198	0	0.013	0.0046	0	0.0089	0	0.0165	0.0029	0.0118	0	0.0119	0.0002	0.0091	0	0.0092	0.0164	0.0107	0.01	0	0.0034	0	0.0099	0	0.0119	0	0.0037	0.0233
Total	101.202	100.654	101.629	101.049	100.509	100.541	100.983	100.464	100.651	100.702	100.396	101.036	100.898	101.412	100.921	99.3226	99.5706	101.046	100.122	100.063	99.8634	101.1	100.17	100.121	100.684	99.9633	100.463	100.536	100.807	100.546	101.067	101.009	99.069	100.188	100.361
Si	1.82291	1.85505	1.852	1.88284	1.87716	1.87068	1.8433	1.86993	1.86376	1.84723	1.87829	1.84488	1.84038	1.82158	1.83622	1.84462	1.84295	1.86255	1.822	1.82378	1.85094	1.87079	1.8351	1.87577	1.85024	1.85599	1.84877	1.85143	1.84766	1.82609	1.87983	1.85073	1.86046	1.86284	1.86064
Ti	0.00454923	0.0029523	0.00452555	0.00348044	0.00295566	0.00483085	0.00294606	0.00322174	0.00402156	0.00509655	0.00483483	0.00583077	0.00392351	0.00345469	0.00379803	0.00758946	0.00862709	0.00750387	0.00644406	0.0104963	0.00899296	0.00770204	0.00771595	0.00674367	0.00858002	0.00966054	0.00866205	0.0076443	0.00915966	0.00924905	0.00812419	0.00761488	0.00808923	0.00876774	0.00944126
Al	0.350524	0.312028	0.294059	0.245397	0.259758	0.278797	0.308852	0.276795	0.28313	0.314795	0.261351	0.328287	0.341946	0.311035	0.328137	0.358441	0.370879	0.302188	0.364629	0.376956	0.322757	0.306809	0.369696	0.274705	0.330323	0.324202	0.360073	0.344004	0.343655	0.380214	0.283568	0.335058	0.326025	0.311048	0.338111
Cr	0.0347095	0.0302135	0.0351025	0.0302344	0.0320442	0.0313126	0.0316671	0.0310559	0.0304462	0.0259448	0.0251949	0.0252125	0.0257898	0.0263404	0.0233314	0.0227353	0.0184249	0.0128895	0.0126372	0.0126808	0.0129117	0.0108511	0.0086423	0.012246	0.0110348	0.01071	0.00989861	0.01146	0.0126642	0.0111222	0.0139325	0.0133885	0.0134	0.0143347	0.0103971
Fe	0.104429	0.105035	0.106549	0.111919	0.108739	0.115475	0.108089	0.119099	0.104625	0.11273	0.114674	0.112457	0.116264	0.1365	0.126084	0.127171	0.128886	0.139985	0.139226	0.135987	0.141675	0.140694	0.155432	0.147616	0.156459	0.149666	0.16408	0.17075	0.173036	0.165088	0.159431	0.169146	0.158763	0.158123	0.152593
Mg	0.957127	0.966862	0.990127	1.00213	1.01056	1.00618	0.999847	1.02623	1.01046	0.991831	1.02883	0.960264	0.980438	1.14533	1.03031	0.970005	0.991507	1.03392	1.05913	0.993497	1.02447	1.00726	1.06565	1.05238	1.04067	1.01247	1.00576	1.067	1.07096	1.04175	1.04101	1.08254	1.01489	1.0136	1.00128
Mn	0.00251912	0.000631637	0	0	0.000305588	0.000746452	0	0	6.94361e-05	0	0.000632135	0.000210921	0.00165036	0.00117901	0.000442733	0.00115677	0.00105341	0.00346037	0.00159166	0.00354335	0.001973	0.00181196	0.00251818	0.00192268	0.00335003	0.00385186	0.00321508	0.00432195	0.00324399	0.00260898	0.00274025	0.00435173	0.00355286	0.00351843	0.00196204
Ca	0.668186	0.671303	0.669259	0.668115	0.654462	0.634961	0.655389	0.617985	0.65111	0.654878	0.634337	0.666249	0.632382	0.532583	0.606894	0.590706	0.554893	0.572986	0.545447	0.574851	0.57106	0.577563	0.479903	0.563522	0.529701	0.557944	0.514277	0.467571	0.466149	0.488554	0.536456	0.458789	0.533878	0.553259	0.539904
Na	0.068542	0.0525144	0.0523827	0.0618938	0.0551714	0.0524087	0.0668178	0.0562963	0.0545454	0.049014	0.0488033	0.0550407	0.0565014	0.0554972	0.0550845	0.0694327	0.0725414	0.0717429	0.063081	0.0773874	0.0706537	0.077893	0.0857946	0.0766241	0.0790566	0.0817257	0.085684	0.0766053	0.0761393	0.0881818	0.0759172	0.0884459	0.0821477	0.0802615	0.0816093
K	0.00137961	0.000805625	0.000740388	0	0.000815655	8.64762e-05	0	0.000901503	0	0.000591369	0.000209536	0	0.000403671	0	0.000748422	0.000133304	0.000539497	0	0.000542313	9.13774e-06	0.000416641	0	0.000417856	0.000749029	0.000485473	0.000457498	0	0.000154007	0	0.000449185	0	0.000536761	0	0.000169017	0.00105923
XMg	0.901627	0.90201	0.902844	0.899539	0.90285	0.89705	0.902441	0.896014	0.906173	0.897941	0.899717	0.895167	0.893987	0.893511	0.890968	0.884092	0.884963	0.880753	0.883819	0.879603	0.87851	0.877439	0.872709	0.876986	0.869305	0.871215	0.859741	0.862048	0.860902	0.863206	0.86719	0.864866	0.864728	0.86505	0.867756
XCr	0.0900999	0.0882812	0.106642	0.109691	0.109815	0.100973	0.0929966	0.10088	0.0970933	0.0761425	0.0879265	0.0713226	0.0701313	0.0780744	0.0663827	0.059645	0.047328	0.0409089	0.0334968	0.0325451	0.0384657	0.0341595	0.0228428	0.0426763	0.0323261	0.0319785	0.026755	0.0322397	0.0355418	0.028421	0.0468317	0.0384233	0.0394787	0.044055	0.0298331
Distance = 0 marks the boundary between the partially molten pyroxenite and the reaction zone.
XMg = Mg/(Mg+Fetot). XCr = Cr/(Cr+Al). Cations are calculated on the basis of 6 oxygens and all Fe = Fe2+.
Representative major element compositions of clinopyroxene from experiment PPR7 (2 GPa, 1400°C)													Representative major element compositions of clinopyroxene RIMS from experiment PPR7 (2 GPa, 1400°C)
Distance (µm)	-820	-760	-670	-590	-540	-470	-410	-330	-250	-190	-110		D (µm)	-0.81	-0.76	-0.67	-0.57	-0.51	-0.47	-0.4	-0.311	-0.24	-0.178	-0.15
SiO2	52.25	51.38	52.66	51.85	51.85	51.99	51.99	51.38	52.66	52.75	52.41		SiO2	52.11	51.38	52.66	51.85	51.85	51.99	51.99	51.38	52.66	52.75	52.41
TiO2	0.13	0.12	0.11	0.19	0.14	0.16	0.16	0.16	0.17	0.18	0.22		TiO2	0.09	0.11	0.12	0.18	0.15	0.18	0.16	0.17	0.21	0.19	0.23
Al2O3	6.51	7.94	6.67	8.4	8.4	7.32	7.32	7.65	6.87	6.71	7.51		Al2O3	6.61	7.94	6.67	7.85	8.11	7.12	7.32	7.65	6.87	6.71	7.51
Cr2O3	1.18	1.04	1.22	0.9609	0.9609	1.2887	1.2887	1.0408	0.96	0.87	0.92		Cr2O3	1.16	1.22	1.14	0.9609	0.9609	1.228	1.1887	1.0408	0.96	0.87	0.92
FeO	3.68	3.68	3.75	3.65	3.65	3.65	3.65	3.68	3.95	4.15	4.36		FeO	3.56	3.62	3.75	3.55	3.61	3.72	3.82	3.77	3.95	4.15	4.36
MgO	20.6	20.25	20.72	19.72	19.78	20.86	20.66	20.85	20.28	20.39	19.92		MgO	20.53	20.25	20.82	19.72	19.78	20.66	20.64	20.26	20.28	20.39	19.92
MnO	0.0089	0.0037	0	0.0244	0.0244	0.0008	0.0008	0.0037	0	0.0089	0.0347		MnO	0.0077	0.0037	0	0.0244	0.0244	0.0008	0.0008	0.0037	0	0.0089	0.0347
CaO	14.55	14.78	14.71	15.1	15.1	14.33	14.33	14.78	14.71	14.55	14.65		CaO	14.48	14.78	14.71	15.1	15.1	14.33	14.33	14.78	14.71	14.55	14.65
Na2O	0.61	0.6189	0.5723	0.5667	0.5667	0.5822	0.5822	0.6189	0.5723	0.61	0.5906		Na2O	0.65	0.622	0.598	0.5922	0.5234	0.6133	0.5566	0.6577	0.5995	0.6255	0.623
K2O	0.015	0	0.0042	0.0083	0.0083	0	0	0	0.004	0.015	0.001		K2O	0.016	0	0.0042	0.0083	0.0083	0	0	0	0.0042	0.015	0.0005
Total	99.701	99.8319	100.586	100.47	100.48	100.195	99.995	100.182	100.2	100.15	100.65		Total	99.2137	99.9257	100.472	99.8358	100.117	99.8421	100.006	99.7122	100.244	100.259	100.658
Si	1.86853	1.83581	1.86678	1.83893	1.83878	1.84839	1.85166	1.831	1.87263	1.87578	1.85867		Si	1.87043	1.83417	1.86768	1.85037	1.84503	1.85504	1.852	1.83921	1.87167	1.87545	1.85816
Ti	0.00349694	0.00322513	0.00293317	0.00506876	0.00373456	0.00427883	0.0042864	0.00428889	0.00454727	0.00481465	0.0058687		Ti	0.00242993	0.00295373	0.00320135	0.00483187	0.00401492	0.00483099	0.00428719	0.00457738	0.00561434	0.00508122	0.00613378
Al	0.274378	0.334356	0.278672	0.351116	0.351086	0.306718	0.30726	0.321299	0.287927	0.281214	0.313893		Al	0.279625	0.334057	0.278806	0.330168	0.340118	0.299411	0.307317	0.32274	0.287779	0.281164	0.313807
Cr	0.0334	0.0294	0.0342	0.0269446	0.0269423	0.0362244	0.0362885	0.029325	0.026991	0.02446	0.025796		Cr	0.0329196	0.0344336	0.031967	0.0271123	0.0270339	0.0346424	0.0334788	0.0294564	0.0269771	0.0244556	0.0257889
Fe	0.110057	0.109961	0.111173	0.108259	0.10825	0.108523	0.108715	0.109672	0.117469	0.123414	0.129309		Fe	0.106863	0.108071	0.111227	0.105949	0.107428	0.111002	0.1138	0.112858	0.117409	0.123392	0.129274
Mg	1.09803	1.07844	1.09481	1.04246	1.04554	1.10541	1.09675	1.10748	1.07491	1.08072	1.05296		Mg	1.09836	1.07747	1.10062	1.04895	1.0491	1.09875	1.09589	1.08096	1.07436	1.08053	1.05267
Mn	0.000269581	0.000111975	0	0.00073298	0.000732919	2.40907e-05	2.41333e-05	0.000111681	0.000612182	0.000174496	0.00111262		Mn	0.000234097	0.000111875	0	0.000737542	0.00073541	2.41773e-05	2.41378e-05	0.000112182	0	0.000268015	0.00104204
Ca	0.557487	0.565806	0.558707	0.573789	0.573741	0.545855	0.546821	0.564321	0.560456	0.554347	0.556652		Ca	0.556861	0.5653	0.558975	0.577359	0.57569	0.547819	0.546922	0.566851	0.560169	0.554248	0.556499
Na	0.0422948	0.0428745	0.0393351	0.0389685	0.0389653	0.0401319	0.0402029	0.042762	0.0394583	0.0420566	0.0406093		Na	0.0452353	0.0430507	0.0411212	0.0409754	0.0361103	0.0424277	0.0384422	0.0456466	0.0413125	0.0431176	0.0428253
K	0.000684272	0	0.000189927	0.000375508	0.000375476	0	0	0	0	0.001	0		K	0.000732595	0	0.000190018	0.000377844	0.000376752	0	0	0	0.000190424	0.000680297	2.26132e-05
XMg	0.9089	0.907471	0.907815	0.90592	0.906179	0.910602	0.909815	0.909894	0.901484	0.897508	0.890626		XMg	0.911334	0.908842	0.908217	0.908261	0.907111	0.908244	0.905926	0.905465	0.901484	0.897508	0.890626
XCr	0.108414	0.109293	0.0808286	0.0712705	0.0712705	0.105628	0.105628	0.0836364	0.085708	0.0800197	0.0759399		XCr	0.105328	0.0934449	0.102863	0.0758851	0.0736314	0.103703	0.0982371	0.0836364	0.085708	0.0800197	0.0759399
Distance = 0 marks the boundary between the partially molten pyroxenite and the reaction zone.													Distance = 0 marks the boundary between the partially molten pyroxenite and the reaction zone.
XMg = Mg/(Mg+Fetot). XCr = Cr/(Cr+Al). Cations are calculated on the basis of 6 oxygens and all Fe = Fe2+.													XMg = Mg/(Mg+Fetot). XCr = Cr/(Cr+Al). Cations are calculated on the basis of 6 oxygens and all Fe = Fe2+.
[truncated: 10 more columns]

## Sheet: Table S7
Supplementary Table 7
Representative major element compositions (wt%) of spinel from experiment PPR1 (2 GPa, 1300°C)
Distance (µm)	-910	-860	-780	-670	-630	-620	-580	-560	-510	-440	-380	-340	-270	-190	-120
SiO2	0.13	0.23	0.166	0.26	0.12	0.097	0.24	0.24	0.42	0.08	0.23	0.14	0.18	0.31	0.21
TiO2	0.0098	0.0216	0.0041	0.014	0.022	0.024	0.0042	0.011	0.0387	0.0536	0.0648	0.089	0.268	0.198	0.299
Al2O3	59.29	60.11	60.11	61.07	61.06	60.49	61.77	60.71	59.41	61.43	59.95	61.77	63.35	62.84	63.94
Cr2O3	11	10.43	10.16	8.96	9.42	8.55	8.63	8.81	8.48	8.66	8.15	7.88	5.81	6.72	5.16
FeO	8.12	8.15	7.91	7.87	7.98	8.03	8.01	7.65	7.95	7.94	7.68	7.46	7.92	7.82	7.89
MgO	22.28	22.17	22.3	22.63	22.58	23.38	22.96	22.44	22.33	22.46	23.82	22.86	22.93	23.64	22.94
CaO	0.1033	0.1408	0.1718	0.0458	0.1419	0.0649	0.0914	0.114	0.9581	0.15	0.1049	0.1698	0.0551	0.0522	0.12
Na2O	0.0206	0.0183	0	0	0.0148	0	0	0.011	0	0.0306	0.0331	0.0265	0	0.0128	0.0123
Total	100.954	101.271	100.822	100.85	101.339	100.636	101.706	99.986	99.5868	100.804	100.033	100.395	100.513	101.593	100.571
Si	0.00328113	0.00577972	0.00418195	0.0065168	0.00297905	0.00242112	0.00593309	0.00606301	0.010875	0.00200495	0.00577498	0.00350636	0.00448143	0.0076424	0.00522101
Ti	0.000186053	0.000408286	7.76938e-05	0.000263949	0.000410819	0.00044	7.80999e-05	0.000209027	0.000753741	0.00101044	0.00122385	0.00167668	0.00501892	0.00367168	0.00559163
Al	1.76366	1.78025	1.78473	1.80403	1.80407	1.77944	1.80874	1.80756	1.778	1.81447	1.77405	1.82331	1.85885	1.82583	1.87354
Cr	0.219507	0.207224	0.202368	0.17756	0.186857	0.168728	0.171218	0.175966	0.1703	0.171596	0.161792	0.156038	0.114366	0.130983	0.101429
Fe	0.171393	0.171274	0.166649	0.164965	0.165674	0.167616	0.165599	0.16162	0.172148	0.166414	0.161265	0.156251	0.164902	0.161225	0.164047
Mg	0.838166	0.830385	0.837357	0.845436	0.835517	0.86981	0.846012	0.844959	0.861794	0.838993	0.891456	0.853374	0.850909	0.868662	0.846383
Ca	0.00279344	0.00379088	0.00463716	0.00122994	0.00377431	0.00173559	0.00242088	0.00308561	0.0265796	0.00402776	0.002822	0.00455643	0.00146979	0.00137879	0.0031965
Na	0.00100807	0.000891608	0	0	0.000712364	0	0	0.000538784	0	0.00148689	0.00161137	0.00128682	0	0.000611818	0.000592905
XMg	0.83023	0.829009	0.834016	0.836733	0.834523	0.838431	0.836302	0.839436	0.833503	0.834481	0.846811	0.845239	0.837665	0.843454	0.839
XCr	0.110685	0.104265	0.101841	0.0896049	0.0938541	0.0866087	0.0864758	0.088714	0.0866509	0.0864003	0.0835769	0.0788331	0.057959	0.066937	0.0513572
Distance = 0 marks the boundary between the partially molten pyroxenite and the reaction zone.
XMg = Mg/(Mg+Fetot). XCr = Cr/(Cr+Al). Cations are calculated on the basis of 4 oxygens and all Fe = Fe2+.
Representative major element compositions of spinel from experiment PPR2 (2 GPa, 1350°C)
Distance (µm)	-980	-860	-750	-660	-530	-410	-350	-340	-260	-220	-160
SiO2	0.26	0.5931	0.33	0.2728	0.75	0.2241	0.3178	0.53	0.42	0.52	0.2987
TiO2	0.0089	0.0202	0.0148	0.0223	0.0578	0.1268	0.1549	0.186	0.188	0.1689	0.225
Al2O3	56.44	56.91	56.98	58.16	55.77	60.9	61.51	61.4	62.38	64.68	65.82
Cr2O3	13.68	13.76	13.26	13.27	11.63	10.83	9.31	7.15	6.55	4.8	4.9
FeO	8.25	7.89	8.02	7.69	8.23	7.64	7.86	7.77	7.99	7.95	7.95
MgO	21.86	21.18	21.75	21.41	23.12	21.93	22.46	23.06	23.03	23.01	22.26
CaO	0.034	0.0223	0.078	0.0134	0.0478	0.0283	0.0217	0.142	0.1128	0.1847	0.0249
Na2O	0	0.0313	0.0507	0.0125	0.0298	0	0.0179	0	0	0	0
Total	100.533	100.407	100.484	100.851	99.6354	101.679	101.652	100.238	100.671	101.314	101.479
Si	0.00665965	0.0152322	0.00844081	0.00695278	0.0192029	0.00561306	0.00791754	0.0132823	0.0104656	0.0128035	0.00735693
Ti	0.000171475	0.000390228	0.00028475	0.000427514	0.00111318	0.00238896	0.00290282	0.00350624	0.00352373	0.00312815	0.00416846
Al	1.70381	1.72258	1.7177	1.747	1.68291	1.79775	1.80608	1.81351	1.83195	1.87694	1.91062
Cr	0.277039	0.279402	0.268158	0.2674	0.23543	0.214468	0.183385	0.141671	0.129042	0.0934425	0.0954188
Fe	0.176721	0.16946	0.171554	0.163907	0.176223	0.160032	0.163763	0.162845	0.166501	0.1637	0.163751
Mg	0.834572	0.810767	0.82921	0.813328	0.882327	0.818713	0.83403	0.861373	0.855347	0.844459	0.817187
Ca	0.000933074	0.000613618	0.00213758	0.000365913	0.00131127	0.000759456	0.000579235	0.0038128	0.00301149	0.0048725	0.000657081
Na	0	0.00155856	0.00251433	0.000617687	0.00147934	0	0.000864637	0	0	0	0
XMg	0.825252	0.827121	0.828577	0.832275	0.833524	0.836492	0.835875	0.841006	0.837059	0.837624	0.833067
XCr	0.139859	0.139563	0.135034	0.132744	0.122726	0.106583	0.0921779	0.0724591	0.0658045	0.0474234	0.0475658
Distance = 0 marks the boundary between the partially molten pyroxenite and the reaction zone.
XMg = Mg/(Mg+Fetot). XCr = Cr/(Cr+Al). Cations are calculated on the basis of 4 oxygens and all Fe = Fe2+.
Representative major element compositions of spinel from experiment PPR3 (2 GPa, 1380°C)
Distance (µm)	-1180	-1110	-980	-820	-670	-590	-560	-490	-440
SiO2	0.4221	0.2256	0.323008	0.1456	0.821013	0.368	0.323214	0.43	0.21
TiO2	0.0894	0.0868	0.135	0.1324	0.112785	0.074263	0.0993	0.18	0.22
Al2O3	53.78	53.9703	54.2956	55.9187	55.5376	57.4946	58.2156	60.55	61.24
Cr2O3	16.77	16.14	15.45	14.7496	13.3505	11.6905	11.5669	9.25	8.453
FeO	8.06	8.03	8.0134	7.993	8.11	7.882	7.9104	7.95	7.966
MgO	21.66	21.97	22.2789	22.7115	22.2527	22.6085	22.3716	22.89	22.65
CaO	0.067568	0.067568	0.104854	0.129059	0.060358	0.41921	0.055826	0.08	0.09
Na2O	0.010403	0.010403	0	0.025132	0.005665	0.055517	0	0	0
Total	100.859	100.501	100.601	101.805	100.251	100.593	100.543	101.33	100.829
Si	0.0108922	0.00582334	0.00830698	0.00368502	0.021062	0.00932642	0.0082045	0.0107409	0.00526084
Ti	0.00173528	0.00168533	0.00261153	0.00252057	0.00217637	0.0014157	0.00189602	0.00338202	0.00414563
Al	1.6356	1.64188	1.64569	1.66798	1.67916	1.71731	1.74163	1.78255	1.80812
Cr	0.342146	0.329392	0.314149	0.295145	0.270785	0.234249	0.232143	0.18268	0.167426
Fe	0.173937	0.173342	0.172347	0.169178	0.173991	0.167055	0.167926	0.166072	0.166891
Mg	0.833096	0.845276	0.854002	0.856761	0.850879	0.854032	0.846437	0.852224	0.845745
Ca	0.0018681	0.00186867	0.00288917	0.00349966	0.00165899	0.011383	0.0015183	0.00214102	0.00241567
Na	0.00052048	0.000520638	0	0.00123325	0.000281769	0.00272796	0	0	0
XMg	0.827278	0.829826	0.832078	0.835099	0.830231	0.836395	0.834452	0.836912	0.835192
XCr	0.172998	0.167096	0.160293	0.150345	0.138868	0.120031	0.117614	0.0929561	0.0847496
Distance = 0 marks the boundary between the partially molten pyroxenite and the reaction zone.
XMg = Mg/(Mg+Fetot). XCr = Cr/(Cr+Al). Cations are calculated on the basis of 4 oxygens and all Fe = Fe2+.
Representative major element compositions of spinel from experiment PPR7 (2 GPa, 1400°C)
Distance (µm)	-960	-890	-740	-620	-580	-520
SiO2	0.2674	0.298	0.4047	0.4978	0.345	0.288
TiO2	0.0729	0.0848	0.0843	0.0685	0.078	0.1022
Al2O3	57.95	57.29	53.87	54.73	51.02	56.51
Cr2O3	13.25	13.46	15.98	15.91	14.84	13.21
FeO	7.24	7.22	7.21	7.08	7.64	6.98
MgO	21.59	22.18	22.22	22.54	25.17	23.02
CaO	0.057	0.0039	0.0176	0.0289	0.1043	0.0994
Na2O	0.0404	0	0	0	0	0.0486
Total	100.468	100.537	99.7866	100.855	99.1973	100.258
Si	0.00682692	0.00760038	0.0104874	0.0127434	0.00889967	0.00733483
Ti	0.00139998	0.00162685	0.00164322	0.00131902	0.0015135	0.00195785
Al	1.7437	1.72208	1.64527	1.65124	1.55114	1.6962
Cr	0.267458	0.271419	0.327408	0.322015	0.302667	0.265997
Fe	0.154582	0.153997	0.156253	0.151572	0.164818	0.148665
Mg	0.821582	0.843172	0.858254	0.860041	0.967773	0.873852
Ca	0.00155918	0.000106572	0.000488661	0.000792659	0.00288269	0.00271233
Na	0.00199981	0	0	0	0	0.00239982
XMg	0.841644	0.845566	0.845981	0.850168	0.854477	0.854609
XCr	0.132987	0.136152	0.165971	0.16319	0.163268	0.135561
Distance = 0 marks the boundary between the partially molten pyroxenite and the reaction zone.
XMg = Mg/(Mg+Fetot). XCr = Cr/(Cr+Al). Cations are calculated on the basis of 4 oxygens and all Fe = Fe2+.

## Sheet: Table S8
Supplementary Table 8
Representative major element compositions (wt%) of olivine from experiment PPR1 (2 GPa, 1300°C)
Distance (µm)	-944	-890	-766	-622	-557	-487	-336	-290	-112	-53	Average	std
SiO2	40.64	41.6	40.92	41.1	40.93	40.94	41.24	40.18	40.31	39.99	40.785	0.503151
TiO2	0.0506	0.0269	0	0	0.0311	0	0	0	0	0.0339	0.01425	0.0193499
Al2O3	0.1088	0.1778	0.9432	0.1368	0.1709	0.115	0.1232	0.1132	0.1889	0.5824	0.26602	0.276771
Cr2O3	0.148	0.2007	0.1934	0.1676	0.1107	0.1958	0.0919	0.1063	0.0803	0.1811	0.14758	0.0465021
FeO	10.01	9.66	9.1	9.35	9.12	9.77	9.77	9.77	9.88	9.94	9.637	0.330254
MgO	48.85	47.98	49.12	48.68	49.88	51.48	50.86	49.95	49.37	49.49	49.566	1.03495
MnO	0.0811	0.0458	0	0.0053	0	0.0106	0.0046	0.0296	0.0472	0.041	0.02652	0.0270562
CaO	0.22	0.17	0.21	0.2343	0.16	0.21	0.18	0.19	0.22	0.2486	0.20429	0.028586
Na2O	0.043	0.0102	0.0137	0.0231	0.0253	0	0	0.0342	0.0079	0.053	0.02104	0.018039
Total	100.152	99.8714	100.5	99.6971	100.445	102.721	102.273	100.414	100.119	100.625	100.682	1.00449
Si	0.995756	1.01701	0.993209	1.00676	0.995117	0.977955	0.987878	0.982388	0.988039	0.976822	0.992093	0.0125668
Ti	0.00093257	0.00049467	0	0	0.000568754	0	0	0	0	0.000622867	0.000261886	0.0003559
Al	0.00314183	0.00512293	0.0269813	0.00394935	0.00489699	0.0032376	0.00347816	0.00326193	0.00545693	0.0167664	0.00762935	0.00792834
Cr	0.00286707	0.00387932	0.0037114	0.0032459	0.00212793	0.00369794	0.00174051	0.00205486	0.00155616	0.00349751	0.00283786	0.000891564
Fe	0.205111	0.197499	0.184715	0.191537	0.185431	0.195174	0.19572	0.199767	0.202523	0.203052	0.196053	0.00708225
Mg	1.78402	1.74835	1.77705	1.77734	1.80757	1.83292	1.81592	1.8203	1.80368	1.80184	1.7969	0.0251476
Mn	0.00168309	0.000948382	0	0.000109963	0	0.000214468	9.33315e-05	0.000612986	0.000979917	0.000848269	0.00054904	0.000561754
Ca	0.00577538	0.00445286	0.00546113	0.00614916	0.00416784	0.00537463	0.00461972	0.0049772	0.00577754	0.00650614	0.00532616	0.000761648
Na	0.00204274	0.000483477	0.000644718	0.00109709	0.00119261	0	0	0.00162123	0.000375433	0.00251006	0.000996734	0.000855246
XMg	0.896884	0.898502	0.905842	0.902718	0.906958	0.903765	0.902706	0.901109	0.899052	0.898722	0.901626	0.00334532
Distance = 0 marks the boundary between the partially molten pyroxenite and the reaction zone.
XMg = Mg/(Mg+Fetot). Cations are calculated on the basis of 4 oxygens and all Fe = Fe2+.
Representative major element compositions (wt%) of olivine from experiment PPR2 (2 GPa, 1350°C)
Distance (µm)	-993	-883	-690	-568	-540	-442	-326	-270	-178	-120	-25	Average	std
SiO2	40.5042	40.8918	40.8816	41.1774	41.1978	40.9428	40.953	40.7898	41.3406	41.06	41.12	40.9872	0.228912
TiO2	0	0	0.049368	0.064362	0.006018	0.0255	0.029988	0.059976	0	0.064362	0.05334	0.0320831	0.0272536
Al2O3	0.163914	0.142698	0.099552	0.151062	0.110262	0.080988	0.390558	0.13872	0.260814	0.12	0.113	0.161052	0.08963
Cr2O3	0.050694	0.110262	0.13821	0.180336	0.133926	0.167484	0.18921	0.1224	0.164832	0.15	0.144	0.141032	0.0383858
FeO	10.11	10.04	10.1796	9.4656	9.6798	9.46	9.66	9.89	9.55	9.18	9.32	9.685	0.331541
MgO	48.654	48.9498	49.6638	49.22	49.6842	49.47	49.22	49.52	49.12	49.87	49.57	49.3583	0.360939
MnO	0.089046	0.010506	0.021522	0.00816	0	0	0	0.017952	0	0.00816	0.00816	0.0148642	0.0256796
CaO	0.241434	0.242862	0.18	0.207162	0.253368	0.206856	0.16	0.22	0.17	0.18	0.22	0.207426	0.031613
Na2O	0.00867	0.039678	0	0.027336	0.033252	0.019788	0.022542	0.011118	0.021216	0.027336	0.02	0.0209942	0.0112909
Total	99.9404	100.442	101.23	100.553	101.099	100.373	100.629	100.793	100.635	100.711	100.62	100.639	0.345726
Si	0.995371	0.998322	0.991433	1.00122	0.997453	0.997671	0.995795	0.992323	1.00374	0.996098	0.998828	0.997114	0.00355842
Ti	0	0	0.00090056	0.00117716	0.000109598	0.000467393	0.000548483	0.00109752	0	0.00117448	0.000974591	0.000586343	0.000497995
Al	0.0047474	0.00410589	0.00284538	0.00432895	0.00314629	0.00232587	0.0111924	0.00397736	0.00746327	0.00343099	0.00323498	0.00461807	0.00256857
Cr	0.000984959	0.00212832	0.00265004	0.00346682	0.00256366	0.00322671	0.00363752	0.00235429	0.00316418	0.00287707	0.00276552	0.00271083	0.00073505
Fe	0.207775	0.204986	0.206454	0.192476	0.195993	0.192778	0.196434	0.201212	0.193911	0.186244	0.189326	0.197054	0.00714633
Mg	1.78213	1.78123	1.79519	1.78381	1.79296	1.79675	1.78386	1.79563	1.77761	1.80326	1.7947	1.78974	0.00823642
Mn	0.00185347	0.000217249	0.000442083	0.000168054	0	0	0	0.000369914	0	0.000167672	0.000167886	0.000307848	0.000534498
Ca	0.00635685	0.00635262	0.00467699	0.00539686	0.00657247	0.00540053	0.00416834	0.00573433	0.00442233	0.00467858	0.00572557	0.00540777	0.000832518
Na	0.000413093	0.00187814	0	0.0012887	0.00156092	0.000934881	0.00106273	0.000524412	0.000998737	0.00128577	0.000941916	0.000989936	0.000532152
XMg	0.895586	0.896796	0.896858	0.902607	0.901459	0.903104	0.900806	0.899235	0.901644	0.906387	0.904575	0.900823	0.00341156
Distance = 0 marks the boundary between the partially molten pyroxenite and the reaction zone.
XMg = Mg/(Mg+Fetot). Cations are calculated on the basis of 4 oxygens and all Fe = Fe2+.
Representative major element compositions (wt%) of olivine from experiment PPR3 (2 GPa, 1380°C)
Distance (µm)	-1108	-1050	-940	-875	-826	-744	-722	-630	-560	-480	Average	std
SiO2	41.12	41.07	40.56	40.35	40.5	40.59	40.32	40.05	39.34	39.41	40.331	0.598748
TiO2	0	0.0043	0.0532	0	0.0087	0.013	0.0072	0.0333	0.104	0	0.02237	0.0334431
Al2O3	0.2611	0.1443	0.2039	0.1567	0.1439	0.1573	0.1575	0.1615	0.1373	0.1715	0.1695	0.0371571
Cr2O3	0.0791	0.1413	0.1317	0.2023	0.1629	0.1794	0.1407	0.1329	0.1337	0.1995	0.15035	0.036964
FeO	9.25	9.44	9.32	9.52	9.28	9.53	9.33	9.22	9.11	8.95	9.295	0.179459
MgO	49.42	49.18	49.4	49.31	48.63	48.85	48.6	48.5	48.67	48.63	48.919	0.367346
MnO	0.0822	0.0372	0	0.0434	0.0783	0.0783	0.0628	0.0271	0.0364	0.1054	0.05511	0.0316706
CaO	0.3215	0.286	0.3018	0.2683	0.2782	0.2879	0.2795	0.2853	0.2919	0.256	0.28564	0.0178384
Na2O	0.0606	0.0242	0.0252	0.0022	0.0217	0.0158	0	0.0289	0.0012	0.0376	0.02174	0.0186861
Total	100.594	100.327	99.9958	99.8529	99.1037	99.7017	98.8977	98.439	97.8245	97.76	99.2497	1.00815
Si	0.998877	1.00092	0.992355	0.990173	0.999442	0.996919	0.997463	0.995339	0.985075	0.986927	0.994349	0.00547181
Ti	0	7.88272e-05	0.000979067	0	0.000161493	0.000240168	0.00013398	0.000622507	0.00195884	0	0.000417489	0.000627881
Al	0.00747516	0.00414474	0.00587951	0.00453201	0.00418522	0.00455328	0.0045921	0.00473038	0.00405191	0.00506171	0.0049206	0.0010431
Cr	0.00151919	0.00272267	0.0025476	0.003925	0.00317834	0.00348369	0.00275199	0.00261138	0.00264693	0.00395001	0.00293368	0.00072965
Fe	0.187913	0.1924	0.190696	0.195371	0.191517	0.195745	0.193025	0.191626	0.19077	0.187438	0.19165	0.00271777
Mg	1.78936	1.78649	1.80149	1.80359	1.78872	1.7883	1.79204	1.79658	1.81648	1.81517	1.79782	0.0110787
Mn	0.00169128	0.000767901	0	0.000902076	0.00163663	0.00162888	0.0013159	0.000570458	0.000772009	0.00223566	0.00115208	0.000664493
Ca	0.00836755	0.00746794	0.00791128	0.00705418	0.0073556	0.00757602	0.00740827	0.00759677	0.00783118	0.00686874	0.00754375	0.000428824
Na	0.00285414	0.0011435	0.0011954	0.000104673	0.00103826	0.000752388	0	0.00139255	5.82586e-05	0.00182562	0.00103648	0.000886336
XMg	0.904963	0.902774	0.904278	0.902264	0.903286	0.901341	0.902761	0.903618	0.90496	0.906403	0.903665	0.00150403
Distance = 0 marks the boundary between the partially molten pyroxenite and the reaction zone.
XMg = Mg/(Mg+Fetot). Cations are calculated on the basis of 4 oxygens and all Fe = Fe2+.
Representative major element compositions (wt%) of olivine from experiment PPR7 (2 GPa, 1400°C)
Distance (µm)	-985	-950	-946	-918	-877	-869	-834	-826	-814	-792	-784	-760	-718	-715	-705	-685	-677	-650	-640	-635	-620	-580	-575	-548	-540	-536	-508	-488	Average	std
SiO2	41.72	41.41	41.74	41.68	40.82	41.86	41.43	41.64	41.75	41.46	41.3	41.42	41.53	41.46	41.17	41.12	40.35	39.4	41.12	39.12	40.63	41.25	39.76	40.8	41.23	41.29	41.2	40.59	41.0804	0.696869
TiO2	0.0215	0.0014	0	0.0359	0	0.033	0	0.0172	0.0158	0.0244	0	0.0244	0.0703	0	0.0086	0.0146	0	0.0014	0.0142	0.0167	0.0056	0.0066	0.0287	0	0.0303	0.0479	0.0143	0.0011	0.0154964	0.0170867
Al2O3	0.1335	0.121	0.0856	0.126	0.1672	0.1324	0.1463	0.1015	0.157	0.1192	0.5809	0.1399	0.1361	0.1098	0.0952	0.1182	0.0968	0.1174	0.4753	0.1152	0.0841	0.0832	0.0994	0.1107	0.1406	0.1673	0.1373	0.1226	0.150704	0.109971
Cr2O3	0.2328	0.143	0.2037	0.2246	0.2092	0.2335	0.1739	0.1874	0.2993	0.2319	0.3266	0.3172	0.2172	0.2209	0.1917	0	0	0	0	0	0	0	0	0	0	0	0	0	0.121889	0.12135
FeO	7.87	7.76	7.79	7.81	8.03	7.87	7.89	7.87	7.97	7.97	8.14	8.17	7.98	7.9	8.39	8.32	8.2	8.25	8.46	8.25	8.29	7.99	8.27	8.15	8.12	8.16	8.02	7.97	8.06643	0.191548
MgO	49.93	49.8	50.21	50.2	48.14	49.79	50.11	50.47	50.29	50.02	49.98	50.29	49.98	49.84	49.8	49.67	49.96	49.89	49.6	50.15	49.96	49.61	50.11	49.93	50.04	50.3	49.92	50.21	49.9357	0.412889
MnO	0.0528	0.0286	0.0272	0.0418	0.0191	0.055	0.0521	0.0169	0	0	0.0498	0	0.0579	0	0	0.0582	0	0.0206	0	0	0.0737	0.0435	0.0251	0	0.0339	0	0	0.0442	0.0250143	0.0240859
CaO	0.28	0.3234	0.29	0.34	0.2841	0.32	0.2885	0.2627	0.2588	0.2922	0.2772	0.2776	0.2919	0.2772	0.2879	0.2528	0.2637	0.2807	0.2602	0.29	0.2728	0.2771	0.31	0.32	0.2753	0.27	0.28	0.29	0.285504	0.0209302
Na2O	0.0108	0.0057	0	0.0248	0.0084	0.0107	0.0386	0.0269	0	0	0.0122	0.0388	0	0	0	0.0149	0.0207	0	0.0136	0.0205	0.022	0.0378	0	0.0245	0.0137	0.0087	0	0	0.0126179	0.0127532
Total	100.26	99.5931	100.347	100.483	97.6898	100.324	100.129	100.593	100.741	100.132	100.696	100.748	100.274	99.8079	99.9434	99.5711	98.8912	97.9634	99.9433	97.9657	99.3382	99.2998	98.6048	99.339	99.8904	100.252	99.5716	99.2395	99.7011	0.8492
Si	1.00926	1.00816	1.00846	1.00627	1.01422	1.01178	1.00434	1.00436	1.00568	1.00517	0.997032	0.999995	1.00556	1.00774	1.00231	1.00416	0.993248	0.981375	1.0005	0.975257	0.995883	1.00822	0.983556	0.998766	1.00273	1.00068	1.0044	0.994501	1.0012	0.00903059
Ti	0.000391227	2.5638e-05	0	0.000651945	0	0.000599976	0	0.00031206	0.000286281	0.000444969	0	0.000443107	0.00128036	0	0.000157489	0.000268185	0	2.623e-05	0.000259886	0.000313162	0.000103248	0.000121341	0.000534031	0	0.0005543	0.000873208	0.000262228	2.02727e-05	0.000283184	0.000311438
Al	0.00380623	0.00347189	0.00243744	0.00358517	0.00489612	0.00377165	0.0041799	0.00288535	0.00445716	0.00340596	0.0165278	0.0039807	0.00388381	0.00314539	0.00273157	0.0034019	0.0028083	0.00344637	0.0136297	0.00338476	0.00242947	0.00239668	0.00289797	0.00319379	0.00403005	0.00477861	0.0039449	0.00354023	0.00432317	0.00313235
Cr	0.00445265	0.00275257	0.0038911	0.00428718	0.0041096	0.00446223	0.00333306	0.00357375	0.00570016	0.00444514	0.00623378	0.00605477	0.00415798	0.00424512	0.00368993	0	0	0	0	0	0	0	0	0	0	0	0	0	0.00233532	0.00232217
Fe	0.159217	0.157995	0.157398	0.157686	0.166852	0.159081	0.159956	0.158748	0.160553	0.161593	0.164339	0.164955	0.161586	0.160584	0.17082	0.169914	0.168805	0.17185	0.172143	0.172001	0.169931	0.163318	0.171086	0.166847	0.165151	0.165385	0.163509	0.163305	0.16445	0.0048824
Mg	1.80034	1.80713	1.80813	1.80644	1.7828	1.79376	1.81062	1.81446	1.8056	1.80754	1.79842	1.80969	1.80375	1.80564	1.80711	1.80792	1.83304	1.8522	1.79879	1.86349	1.82524	1.80732	1.84762	1.8218	1.81394	1.817	1.81393	1.83363	1.81419	0.0178577
Mn	0.00108188	0.000589763	0.000556621	0.000854766	0.000401958	0.001126	0.00106977	0.000345264	0	0	0.0010183	0	0.00118744	0	0	0.00120381	0	0.000434602	0	0	0.00153008	0.000900548	0.000525911	0	0.000698322	0	0	0.000917264	0.000515796	0.000496105
Ca	0.0072573	0.00843575	0.00750691	0.00879473	0.00756294	0.00828699	0.00749327	0.00678886	0.00667923	0.00759009	0.00716986	0.00718068	0.00757248	0.00721887	0.00750966	0.00661432	0.00695477	0.007491	0.00678312	0.00774599	0.00716414	0.00725649	0.00821624	0.0083929	0.00717356	0.00701089	0.00731353	0.00761277	0.00745633	0.000550944
Na	0.000506555	0.000269057	0	0.00116086	0.000404655	0.000501437	0.00181426	0.00125798	0	0	0.000571035	0.0018162	0	0	0	0.000705473	0.000987936	0	0.000641574	0.000990874	0.00104551	0.0017913	0	0.00116282	0.000646004	0.000408803	0	0	0.000595798	0.000601134
XMg	0.918749	0.919601	0.919921	0.919717	0.914419	0.918539	0.918828	0.919548	0.918341	0.917937	0.916272	0.916463	0.917782	0.918329	0.913637	0.914091	0.915675	0.915096	0.912659	0.915499	0.914829	0.917124	0.91525	0.9161	0.916552	0.916572	0.917313	0.918222	0.916895	0.00199062
Distance = 0 marks the boundary between the partially molten pyroxenite and the reaction zone.
XMg = Mg/(Mg+Fetot). Cations are calculated on the basis of 4 oxygens and all Fe = Fe2+.
Representative major element compositions (wt%) of olivine from experiment PPR8 (2 GPa, 1450°C)
Distance (µm)											Average	std
SiO2	41.67	41.55	41.67	41.61	41.74	41.76	41.59	41.25	41.33	41.42	41.559	0.172784
TiO2	0.0445	0.0577	0.0389	0	0.0039	0.0468	0	0	0.01	0.01	0.02118	0.0229547
Al2O3	0.136	0.1391	0.1391	0.1202	0.1341	0.1446	0.1107	0.09	0.12	0.13	0.12638	0.0165633
Cr2O3	0	0	0	0	0	0	0	0	0	0	0	0
FeO	5.96	6.12	5.84	6.1	5.85	6	5.76	6.02	5.88	5.95	5.948	0.116409
MgO	51.83	51.96	51.62	51.83	52	52.26	52.51	51.88	51.65	51.88	51.942	0.268568
MnO	0.0296	0.0562	0	0.0518	0	0.0746	0.0673	0.04	0.02	0	0.03395	0.0284532
CaO	0.31	0.37	0.38	0.33	0.36	0.31	0.32	0.38	0.33	0.37	0.346	0.0287518
Na2O	0.0144	0.0373	0	0.0072	0.0276	0.0392	0	0	0	0	0.01257	0.0162236
Total	99.9945	100.29	99.6894	100.049	100.134	100.635	100.358	99.66	99.34	99.76	99.991	0.385968
Si	1.00255	0.99833	1.00484	1.0015	1.00249	0.999096	0.997007	0.997206	1.00097	0.999367	1.00034	0.00255963
Ti	0.000805331	0.00104282	0.000705596	0	7.04567e-05	0.000842217	0	0	0.000182174	0.000181487	0.000383009	0.000414644
Al	0.00385635	0.00393899	0.00395327	0.00340966	0.00379585	0.00407727	0.0031276	0.00256424	0.00342524	0.00369669	0.00358452	0.000464431
Cr	0	0	0	0	0	0	0	0	0	0	0	0
Fe	0.119918	0.122973	0.117773	0.122783	0.1175	0.120048	0.115475	0.121706	0.119094	0.120057	0.119733	0.00238751
Mg	1.85866	1.86083	1.85536	1.85938	1.86151	1.86359	1.87623	1.86937	1.86449	1.86574	1.86352	0.0059667
Mn	0.000603199	0.00114374	0	0.00105601	0	0.00151172	0.0013665	0.000819043	0.000410271	0	0.000691048	0.000577681
Ca	0.00799103	0.00952497	0.00981787	0.00850989	0.00926376	0.00794633	0.00821898	0.00984245	0.00856303	0.00956479	0.00892431	0.000756809
Na	0.000671722	0.00173763	0	0.000335991	0.00128523	0.00181835	0	0	0	0	0.000584891	0.000754296
XMg	0.939392	0.938011	0.940312	0.938056	0.940627	0.939481	0.942022	0.938874	0.93996	0.939542	0.939628	0.00120391
Distance is not reported for this run due to loss of regular layered configuration.
XMg = Mg/(Mg+Fetot). Cations are calculated on the basis of 4 oxygens and all Fe = Fe2+.

## Sheet: Table S9
Supplementary Table 9
Average compositions (wt%) of glasses in reaction experiment at 2GPa and 1450°C
												Average	std
SiO2	48.7373	48.9397	48.8888	49.2226	48.8883	49.0001	48.5589	48.6602	48.6129	48.9367	48.8296	48.8432	0.192222
TiO2	0.447898	0.484445	0.4396	0.443176	0.432843	0.474542	0.428479	0.379215	0.475333	0.343403	0.425002	0.433994	0.0418658
Al2O3	11.9248	12.0555	11.9947	11.9947	12.0172	12.0619	12.1727	12.0326	12.1583	11.9773	11.9589	12.0317	0.0774773
Cr2O3	0.395881	0.388344	0.342457	0.4097	0.367193	0.311717	0.398858	0.262965	0.401273	0.34159	0.403498	0.365771	0.0466324
FeO	6.88757	7.22525	6.90231	6.96824	7.03028	6.93608	7.0703	7.09119	6.87119	7.23272	7.01913	7.0213	0.125823
MgO	21.1562	20.6046	20.9523	20.5204	20.9998	20.7167	20.8965	21.1105	21.0474	20.7613	21.0574	20.893	0.212797
MnO	0.0465682	0.0239494	0.00603313	0.0607824	0.0646381	0.035494	0.031649	0.0499236	0.00151348	0.0538928	0.0662354	0.0400618	0.0224599
CaO	8.02865	7.86188	8.0169	7.86834	7.69791	7.98361	7.9934	7.97759	7.92053	7.85727	7.77987	7.90781	0.105478
Na2O	1.35428	1.38442	1.42136	1.45635	1.40606	1.45434	1.38972	1.39582	1.47312	1.43043	1.42005	1.4169	0.0355083
K2O	0.0489326	0.042341	0.0580816	0.0670528	0.0596815	0.0425115	0.0738477	0.0587876	0.0473214	0.0713198	0.0533535	0.0566574	0.0109411
Total	99.028	99.0104	99.0226	99.0114	98.9639	99.0169	99.0143	99.0188	99.0089	99.0059	99.013	99.0104	0.0166677
XMg	0.84552	0.835567	0.84397	0.839934	0.841837	0.841826	0.84042	0.841389	0.845158	0.836465	0.842413	0.841318	0.00317052
XMg = Mg/(Mg+Fetot).
