# Supplementary material for: Melt–rock interactions in a veined mantle: pyroxenite–peridotite reaction experiments at 2 GPa
Source: Copernicus journal article supplement (doi:10.5194/ejm-34-109-2022), 2022-02-16
Supplement: Supplementary file 2 [file ejm-34-109-2022-supplement.zip]

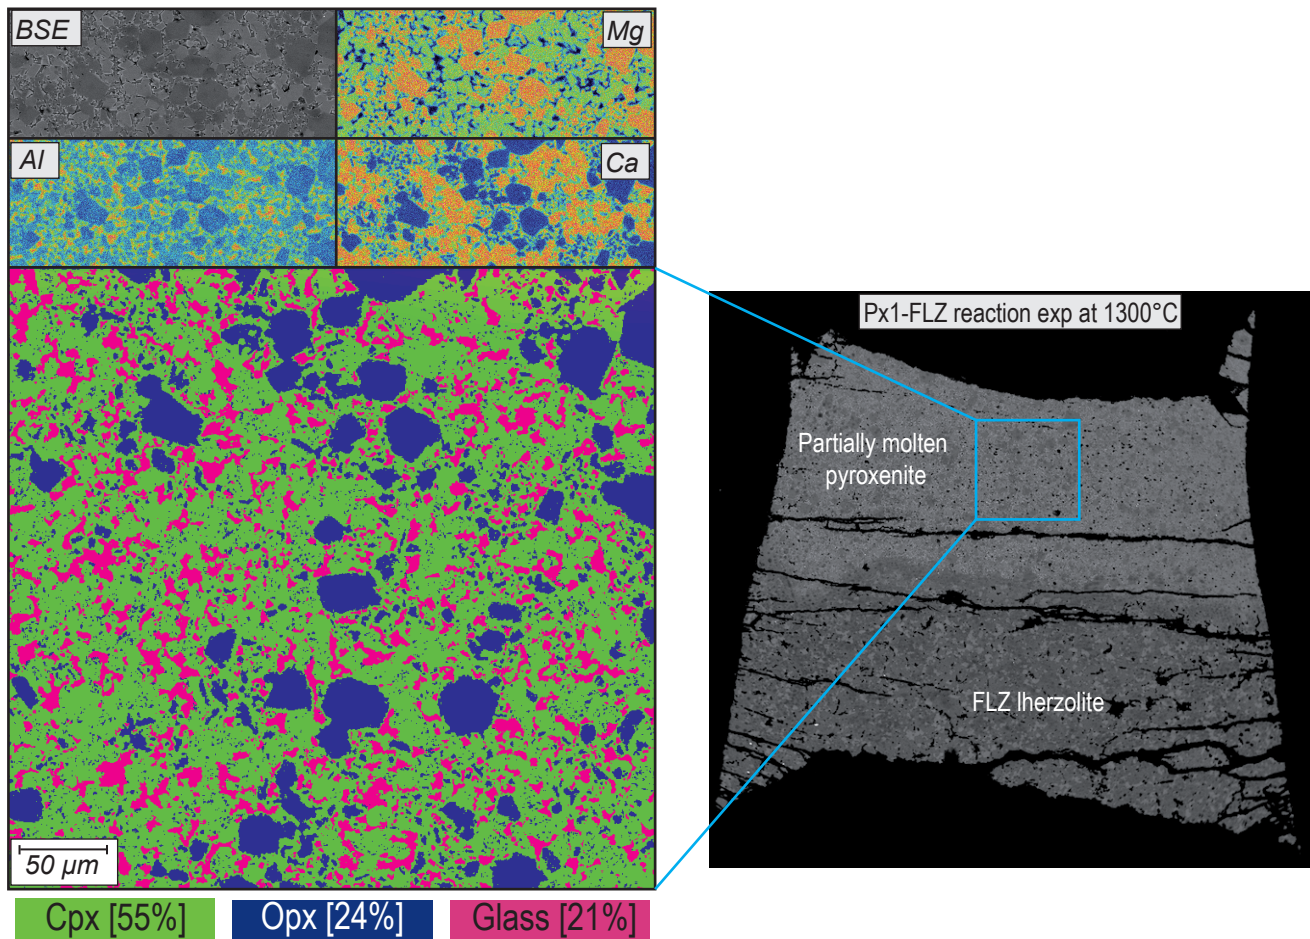

Suppl. Fig. 2. Modal abundances within the partially molten pyroxenite layer after run PPR1 (2 GPa, 1300°C), derived by combining X-ray concentration maps (Mg, Al and Ca). False-colored map highlights three-phase assemblage made by clinopyroxene (*green*), orthopyroxene (*blue*) and glass (*purple*). On the right, the panoramic BSE image of the charge.
