# Supplementary material for: Melt–rock interactions in a veined mantle: pyroxenite–peridotite reaction experiments at 2 GPa
Source: Copernicus journal article supplement (doi:10.5194/ejm-34-109-2022), 2022-02-16
Supplement: Supplementary file 3 [file ejm-34-109-2022-supplement.zip]

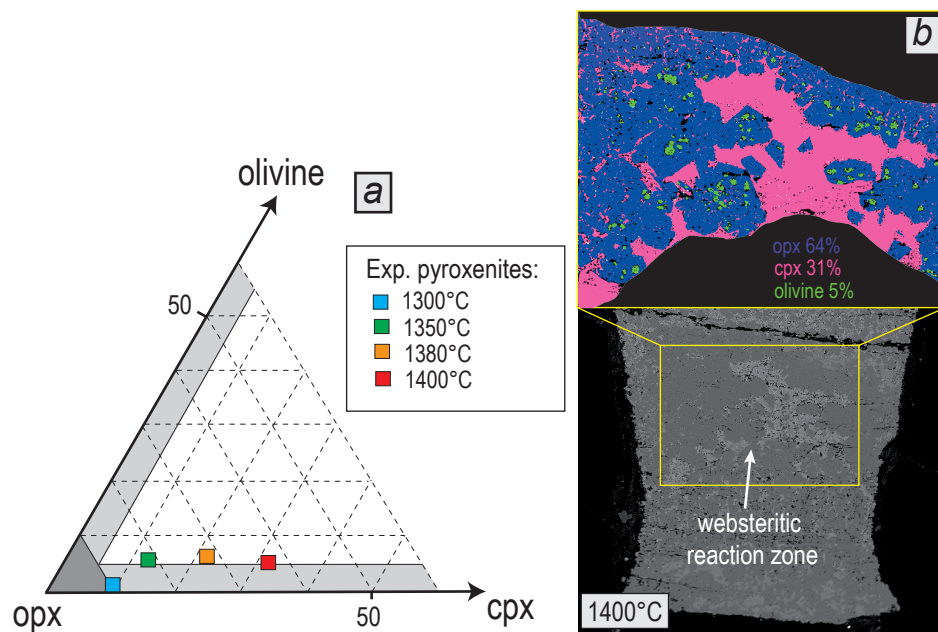

Suppl. Fig. 3. (a) Modal abundances in reaction zone derived by image analysis by combining X-ray concentration maps (Mg, Al, and Ca). (b) False-colored map shows the distribution of orthopyroxene (*purple*), clinopyroxene (*pink*) and olivine (*green*) in websterite reaction zone after run at 2 GPa, 1400°C (below the BSE image showing the pyroxenite-peridotite contact).
