# Supplementary material for: Melt–rock interactions in a veined mantle: pyroxenite–peridotite reaction experiments at 2 GPa
Source: Copernicus journal article supplement (doi:10.5194/ejm-34-109-2022), 2022-02-16
Supplement: Supplementary file 4 [file ejm-34-109-2022-supplement.zip]

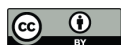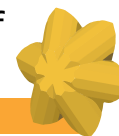

*Supplement of*

**Melt–rock interactions in a veined mantle: pyroxenite–peridotite reaction experiments at 2 GPa**

**Giulio Borghini et al.**

*Correspondence to:* Giulio Borghini ([giulio.borghini@unimi.it](mailto:giulio.borghini@unimi.it))

- [ejm-34-109-2022-supplement-title-page.pdf](#)
- [Fig. S1.pdf](#)
- [Fig. S2.pdf](#)
- [Fig. S3.pdf](#)
- [Tables S1-S9 .xlsx](#)

The copyright of individual parts of the supplement might differ from the article licence.
