# Supplementary material for: Melt–rock interactions in a veined mantle: pyroxenite–peridotite reaction experiments at 2 GPa
Source: Copernicus journal article supplement (doi:10.5194/ejm-34-109-2022), 2022-02-16
Supplement: Supplementary file 5 [file ejm-34-109-2022-supplement.zip]

Archive with 5 entries (5 files):
- Fig. S3.pdf
- ejm-34-109-2022-supplement-title-page.pdf
- Tables S1-S9 .xlsx
- Fig. S1.pdf
- Fig. S2.pdf
